# Supplementary material
Source: PubMed Central journal article supplement (PMC3326499)
Supplement: 1112391109_pnas.201112391SI.pdf [file 1112391109_pnas.201112391SI.pdf]

# Supporting Information

Kwon et al. 10.1073/pnas.1112391109

## VRC01-bound HIV-1 gp120 extended core

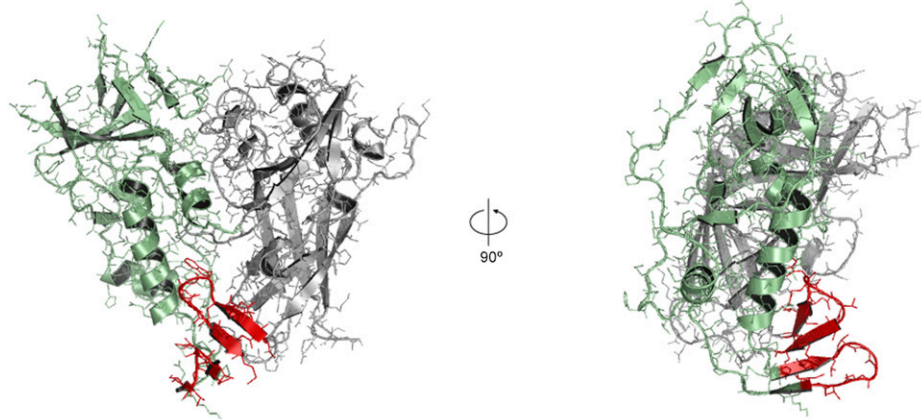

$C\alpha$  RMSD = 0.67 Å

**Movie S1.** Transition from unliganded HIV-1 gp120 extended core to VRC01-bound conformation. Inner domain is shown in teal at the start of the movie and transitions to green in the VRC01-bound state. The outer domain is shown in gray. Residues that compose the bridging sheet in the CD4-bound conformation are shown in red.

[Movie S1](#)

## CD4-bound HIV-1 gp120 extended core

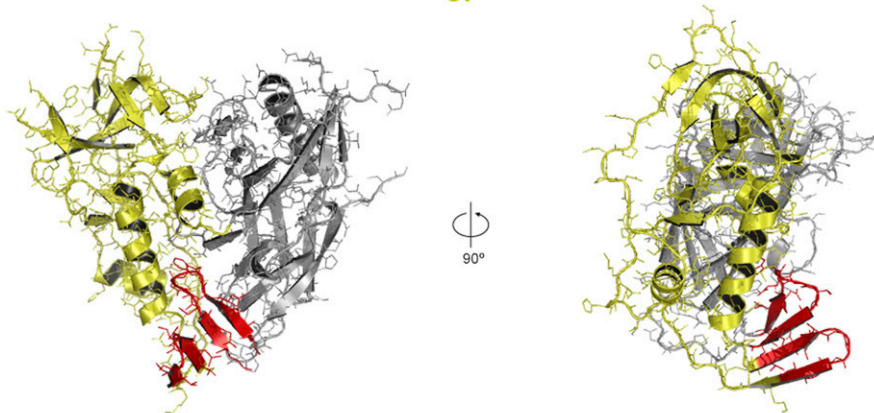

$C\alpha$  RMSD = 1.38 Å

**Movie S2.** Transition from unliganded HIV-1 gp120 extended core to CD4-bound conformation. Inner domain is shown in teal at the start of the movie and transitions to yellow in the CD4-bound state. The outer domain is shown in gray. Residues that compose the bridging sheet in the CD4-bound conformation are shown in red.

[Movie S2](#)

### b12-bound HIV-1 gp120 minimal core

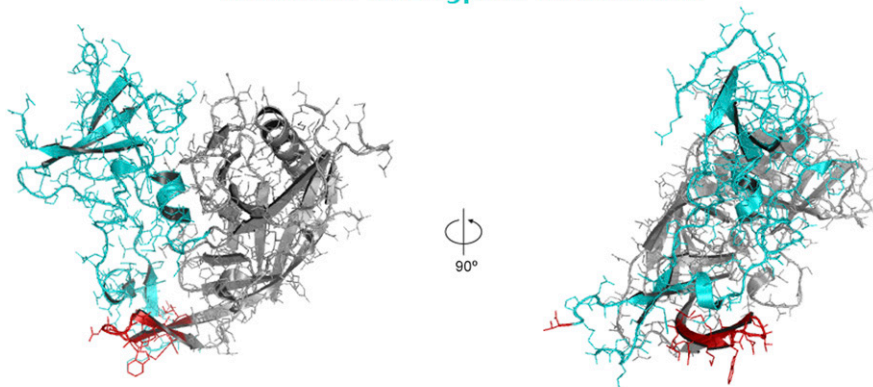

$C\alpha$  RMSD = 4.23 Å

**Movie S3.** Transition from unliganded HIV-1 gp120 minimal core to b12-bound conformation. Inner domain is shown in teal at the start of the movie and transitions to cyan in the b12-bound state. The outer domain is shown in gray. Residues that compose the bridging sheet in the CD4-bound conformation are shown in red.

[Movie S3](#)

### F105-bound HIV-1 gp120 minimal core

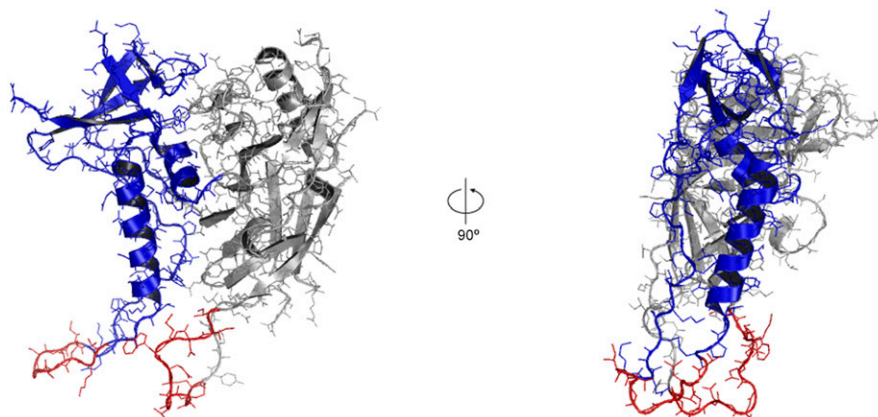

$C\alpha$  RMSD = 6.65 Å

**Movie S4.** Transition from unliganded HIV-1 gp120 minimal core to F105-bound conformation. Inner domain is shown in teal at the start of the movie and transitions to blue in the F105-bound state. The outer domain is shown in gray. Residues that compose the bridging sheet in the CD4-bound conformation are shown in red.

[Movie S4](#)

**b13-bound HIV-1 gp120 minimal core**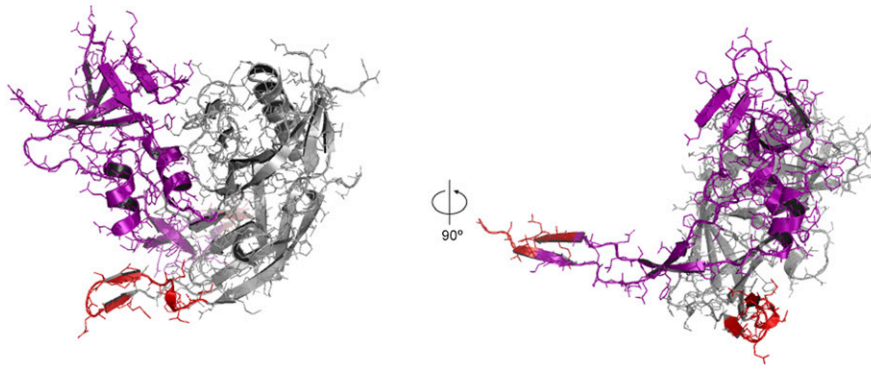 $C\alpha$  RMSD = 11.05 Å

**Movie S5.** Transition from unliganded HIV-1 gp120 minimal core to b13-bound conformation. Inner domain is shown in teal at the start of the movie and transitions to violet in the b13-bound state. The outer domain is shown in gray. Residues that compose the bridging sheet in the CD4-bound conformation are shown in red.

[Movie S5](#)

**Unliganded SIV gp120 minimal core**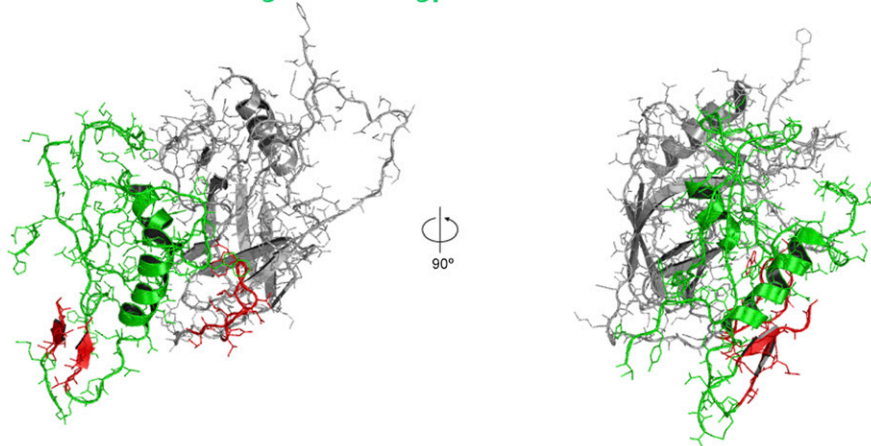 $C\alpha$  RMSD = 9.77 Å

**Movie S6.** Transition from unliganded HIV-1 gp120 minimal core to unliganded SIV conformation. Inner domain is shown in teal at the start of the movie and transitions to bright green in the SIV conformation. The outer domain is shown in gray. Residues that compose the bridging sheet in the CD4-bound conformation are shown in red.

[Movie S6](#)

**Other Supporting Information Files**

[SI Appendix \(PDF\)](#)
