# Supplementary material
Source: PubMed Central journal article supplement (PMC3326499)
Supplement: 1112391109_sapp.pdf [file 1112391109_sapp.pdf]

## Supporting Information

Kwon et al.

### SI Materials and Methods

**Design of pVRC8400-HIV-1 clade B<sub>YU2</sub> ΔV123 expression construct.** The pVRC8400-HIV-1 clade B<sub>YU2</sub> 44-492ΔV123 (core<sub>e</sub>) expression construct was made by inserting a leader sequence encoding mouse IL-2 MYSMQLASCVTTLTLVLLVN followed by the codon-optimized sequence encoding ...

<sup>44</sup>VWKEATTTLFCASDAKAYDTEVHNVWATHACVPTDPNPQEVKLENTENFNMWKNMVEQMHEDIISLWDQSLKPCVKLTGGSVITQACPKVSFEPPIPIHYCAPAGFAILKCNDDKFNGTGPCTNVSTVQCTHGIKPVVSTQLLLNGSLAEEEEIVIRSENFNTNAKTIIVQLNESVINCTRPNNGSGSGGGDIRQAHCNLSKTQWENTLEQIAIKLKEQFGNNKTIIFNPSGGDPEIVTHSFNCGGEFFYCNSTQLFTWNDTRKLNNTGRNITLPCRIKQIINMWQEVGKAMYAPPVIRGQIRCSSNITGLLLTRDGGKDTNGTEIFRPGGGDMRDNRSELYKYKVVKIE<sup>492</sup> ... at the 5' XbaI and 3' BamHI sites. The insert was synthesized (GENEART) to replace the sequence encoding ...

<sup>124</sup>PLCVTLNCTDLRNATNTSSSWETMEKGEIKNCSFNITTSIRDKVQKEYALFYNLDPVPIDNASYRLISCNT<sup>198</sup> ... from the V1/V2 loop with a sequence encoding a GG and to replace the sequence encoding ... <sup>302</sup>NTRKSINIGPGRALYTTGEII<sup>323</sup> ... from the V3 loop with a sequence encoding a GGSGSG linker.

**Design of pVRC8400-HIV-1 clade C<sub>1086</sub> ΔV123 expression construct.** The codon-optimized pVRC8400-HIV-1 clade C<sub>1086</sub> 44-492 ΔV123 (core<sub>e</sub>) expression construct was made by inserting a leader sequence encoding mouse IL-2 MYSMQLASCVTTLTLVLLVN followed by the sequence encoding ...

<sup>44</sup>VWKEAKTTLFCASDAKAYEKEVHNVWATHACVPTDPNPQEMVLAVNTENFNMWKNMVEQMHEDIISLWDESLKPCVKLTGGSAITQACPKVSFDPIPLHYCAPAGFAILKCNKTFNVTGPCTNVSTVQCTHGIKPVVSTQLLLNGSLAEEEEIIRSENLTNNAKTIIVHLNESVINIVCTRPNNGSGSGGGNIRQAHCNINESKWNNTLQKVGEELAKHFPSKTIKFEPPSSGGDLEITTHSFNCRGFEFFYCNSTDLFNGTYRNGTYNHTGRSSNGTITLQCKIKQIINMWQEVGRAIYAPPIEGEITCNSNITGLLLLRDGGQSNETNDTETFRPGGGDMRDNRSELYKYKVVEIK<sup>492</sup> ... at the 5' XbaI and 3' BamHI sites. The insert was synthesized (GENEART) to replace the sequence encoding ...

<sup>124</sup>PLCVTLNCTNVKGNESDTSEVMKNCSFKATTELKDKKHKVHALFYKLDVVPLNGNSSSGEYRLINCNT<sup>198</sup> ... from the V1/V2 loop with a sequence encoding a GG and to replace the sequence encoding ... <sup>302</sup>NTRKSIRIGPGQTFYATGDII<sup>323</sup> ... from the V3 loop with a sequence encoding a GGSGSG linker.

**Design of pVRC8400-HIV-1 clade A/E<sub>93TH057</sub> ΔV123 expression construct.** The codon-optimized pVRC8400-HIV-1 clade A/E<sub>93TH057</sub> 44-492 ΔV123 (core<sub>e</sub>) expression construct was made by inserting a leader sequence encoding mouse interleukin-2 (IL-2) MYSMQLASCVTTLTLVLLVN followed by the sequence encoding ...

<sup>44</sup>VWKDADTTLFCASDAKAHETEVEVHNVWATHACVPTDPNPQEIHLNVTENFNMWKNMVEQMQEDVISLWDQSLQPCVKLTGGSVIKQACPKISFDPIPIHYCTPAGYVILKCNDDKFNVTGPCKNVSSVQCTHGIKPVVSTQLLLNGSLAEEEEIIRSENLTNNAKTIIVHLNKS

EINCTRPSNGGSGSGGDIRKAYCEINGTKWNKVLKQVTEKLKEHFNNKTIIFQPPSGGD  
 LEITMHFFNCRGEFFYCNTTQLFNNTCIGNETMKGCGTITLPCIKQIINMWQGTGQA  
 MYAPPIDGKINCVSNITGILLTRDGGANNTSNETFRPGGGNIKDNWRSELYKYKVVQIE<sup>4</sup>  
<sup>92</sup> ... at the 5' XbaI and 3' BamHI sites. The insert was synthesized (GENEART) to  
 replace the sequence encoding ...  
<sup>124</sup>PLCVTLHCTTAKLTNVTNITNVPNIGNITDEVRNCSFNMTEIRDKKQKVHALFYKL  
 DIVQIEDKNDSSKYRLINCNT<sup>198</sup> ... from the V1/V2 loop with a sequence encoding a  
 GG and to replace the sequence encoding ...  
<sup>302</sup>NMRTSMRIGPGQVFYRTGSIT<sup>323</sup> ... from the V3 loop with a sequence encoding a  
 GGSGSG linker.

**Design of pVRC8400-HIV-1 clade C<sub>ZM109F.PB4</sub> ΔV123 expression construct.** The  
 codon-optimized pVRC8400-HIV-1 clade C<sub>ZM109F.PB4</sub> 44-492 ΔV123 (core<sub>e</sub>) expression  
 construct was made by inserting a leader sequence encoding mouse interleukin-2 (IL-2)  
 MYSMQLASCVTLLVLLVN followed by the sequence encoding ...

<sup>44</sup>VWKEAKTTLFCASDAKSYEREVHNWVATHACVPTDPPQELVMANVTENFNMWKNDMV  
 DQMHEDIISLWDQSLKPCVKLTGGSTITQACPKVSFDPIPIHYCAPAGYAILKCNKTF  
 SGKGPNSVSTVQCTHGIRPVVSTQLLLNGSLAEEEIVIRSENLTDNAKTIIVHLNKS  
 EIECIRPGNGGSGGDIRKAYCKINGSEWNETLTKVSEKLKEYFNKTIIRFAQHSGGDL  
 EVTTHSFNCRGEFFYCNTSELFNSNATESNITLPCRIKQIINMWQGVGRAMYAPPIRGE  
 IKCTSNTGLLLTRDGGNNNNSTEEIFRPEGGNMRDNWRSELYKYKVVVEIK<sup>492</sup> ... at the  
 5' XbaI and 3' BamHI sites. The insert was synthesized (GENEART) to replace the  
 sequence encoding ...  
<sup>124</sup>PLCVTLNCTSPA AHNESETRVKHCSFNITTDVKDRKQKVNATFYDLDIVPLSSSDNS  
 SNSSLYRLISCNT<sup>198</sup> ... from the V1/V2 loop with a sequence encoding a GG and to  
 replace the sequence encoding ... <sup>302</sup>NTRKSIRLPGQTFYATGDVI<sup>323</sup> ... from the V3  
 loop with a sequence encoding a GGSGSG linker.

**Expression, purification, and crystallization.** Detailed procedures of purification and  
 deglycosylation of gp120 glycoproteins were reported previously (1). Briefly,  
 supernatants of transiently transfected 293F or HEK293S GnTi<sup>+</sup> cell culture medium  
 expressing gp120 variants were passed through the 17b conjugated- protein A column,  
 washed with 1X PBS, and eluted with IgG Elution buffer (Pierce). 17b column-purified  
 gp120s were deglycosylated with Endo H and further purified with a Concanavalin A  
 (Sigma) column to remove glycosylated gp120. The final step of purification was to use  
 a Superdex 200 column (GE Healthcare) to obtain homogeneous proteins. Proteins were  
 concentrated to ~10 mg/ml in 2.5 mM Tris-HCl, pH 7.5, 350 mM NaCl, 0.02% NaN<sub>3</sub>.  
 Crystals grew in (16% PEG 3350, 0.1 M CaCl<sub>2</sub>, 0.1M Tris-HCl pH 7.5), (16% PEG 1500,  
 0.1M CaCl<sub>2</sub>, 0.1M imidazole pH 6.5), (10% PEG 3350, 10% iso-propanol, 0.2 M  
 Ammonium citrate pH 7.5), and (14% PEG 1500, 12% PEG 400, 0.1M HEPES pH 7.5)  
 using hanging-drop vapor diffusion method at 293 K for unliganded clade B<sub>YU2</sub>, clade  
 C<sub>1086</sub>, clade C<sub>ZM109F.PB4</sub>, and clade E<sub>93TH057</sub>, respectively. Co-crystals of NBD-556 with  
 clade C<sub>1086</sub> grew in the same conditions that produced unliganded clade C<sub>1086</sub> crystals.  
 For co-crystallization, proteins were prepared to have 100 μM of NBD-556 in 2.5 mM  
 Tris-HCl, pH 7.5, 350 mM NaCl, 0.02% NaN<sub>3</sub>, and 5% DMSO.

**Data collection, structure determination, and refinement.** A single crystal was flash-frozen using a liquid nitrogen stream in cryo-protection solution. Cryo-protection solutions were prepared to contain (7.5% 2r3r-Butanediol, 18% PEG 3350, 0.1M CaCl<sub>2</sub>, 0.1M Tris-HCl 7.5), (20% Glycerol, 18% PEG 1500, 0.1M CaCl<sub>2</sub>, 0.1M imidazole pH 6.5), (15% 2r3r-Butanediol, 12% PEG 3350, 10% iso-propanol, 0.2M Ammonium citrate pH 7.5), and (30% Ethylene glycol, 16% PEG 1500, 12% PEG 400, 0.1M HEPES pH 7.5) for the unliganded clade B<sub>YU2</sub>, clade C<sub>1086</sub>, clade C<sub>ZM109F.PB4</sub>, and clade E<sub>93TH057</sub>, respectively. Data sets were collected to 3.4 Å, 2.8 Å, 4.0 Å and 1.9 Å resolution for clade B<sub>YU2</sub>, clade C<sub>1086</sub>, clade C<sub>ZM109F.PB4</sub>, and clade E<sub>93TH057</sub>, respectively, at the Advanced Photon Source (beamline SER-CAT ID22), indexed, integrated, and scaled with the HKL2000 package (2). Data collected from a crystal of clade B<sub>YU2</sub> showed twinning (twin fraction: 0.29, twin operator=h, -h-k, -l). Initial trial of molecular replacement with the program Phaser (3) using unliganded SIV core<sub>min</sub> (PDB ID: 2BF1) as search model did not produce any solution. Therefore, we proceeded with the CD4-bound gp120 core<sub>e</sub> (PDB ID: 3JWD) as the search model using PHENIX (4) and found three correct molecules out of four in the asymmetric unit. [RFZ=4.9 TFZ=15.0 PAK=0 LLG=199 RFZ=3.4 TFZ=24.2 PAK=0 LLG=579 RFZ=3.2 TFZ=21.1 PAK=0 LLG=779]. To find the remaining molecule, we rigid-body refined the three found molecules, and generated a 2Fo-Fc map using only the outer domains (256-474), without part of the bridging sheet (422-440), of the three molecules to minimize model bias. Electron density of the 2Fo-Fc map unambiguously showed that the inner domain and bridging sheet conformations were the same as those found in the CD4-bound conformation. Then we generated another 2Fo-Fc map using the entire CD4-bound gp120 core. At this point, the electron density of the remaining molecule in the asymmetric unit was clear enough that we were able to fit it manually using Coot (5). Molecular replacement of the data collected from unliganded clade C<sub>1086</sub>, E<sub>93TH057</sub>, and C<sub>ZM109F.PB4</sub> were performed with one (chain A) of four molecules in the unliganded clade B<sub>YU2</sub> gp120. Using PHENIX AutoMR, we found two [RFZ=12.8 TFZ=23.5 PAK=4 LLG=566 RFZ=9.5 TFZ=33.3 PAK=4 LLG=1345 LLG=1368], one molecule [RFZ=12.3 TFZ=21.4 PAK=0 LLG=350 LLG=355], and four molecules [RFZ=10.3 TFZ=10.7 PAK=0 LLG=164 RFZ=9.4 TFZ=22.0 PAK=4 LLG=510 RFZ=10.3 TFZ=29.2 PAK=7 LLG=1108 RFZ=8.5 TFZ=30.9 PAK=8 LLG=1727] in the asymmetric unit for clade C<sub>1086</sub>, E<sub>93TH057</sub>, and C<sub>ZM109F.PB4</sub>, respectively. The initial map generated after rigid-body refinement was of sufficient quality to identify residues that differ from the search model. The map of the clade E<sub>93TH057</sub> was of such good quality that unmodeled electron density for a HEPES molecule, originated from the crystallization buffer, was clearly identifiable (Fig. S4). NCS averaging, solvent flipping, and density modification were applied in refinement, followed by group/individual ADP and TLS refinement using PHENIX. For refinement, NCS restraints, detected automatically by PHENIX, were employed for the initial refinement and released in the final stage of refinement for clade C<sub>1086</sub>, but the restraints were maintained throughout entire refinement cycles for the lower resolution structures, clade B<sub>YU2</sub> and clade C<sub>ZM109</sub>, which provided us better stereochemistry and geometry of the models than releasing the restraints in refinement. Refinement statistics are summarized in Table S1.

**Isothermal titration calorimetry.** Isothermal titration calorimetry experiments were performed using an iTC<sub>200</sub> Microcalorimeter from MicroCal Inc. (Northampton, MA). The calorimetric cell (~ 300 µl), containing wild-type gp120 or gp120 core<sub>e</sub> (44-492

$\Delta$ V12/V3) dialyzed in PBS (GIBCO) buffer, was titrated with sCD4, 17b Fab, or VRC01 Fab dialyzed in the same buffer by using 20 injections of 2  $\mu$ l per injection. The concentration of gp120 full-length or core<sub>e</sub> was 3-5  $\mu$ M and the concentration of the ligands in the injection syringe was between 50 and 75  $\mu$ M. Data were analyzed with Microcal ORIGIN software using a single-site binding model. Protein concentrations were determined by absorbance at 280 nm based on extinction coefficients calculated from the protein sequences. All experiments were carried out at 25°C and 37°C.

**Expression and cross-linking of envelope glycoproteins.** To generate radiolabeled HIV-1 gp120 proteins,  $2 \times 10^6$  293T cells were transfected by the calcium phosphate method with the following codon-optimized vectors: pcDNA3.1-HIV-1 YU2, pcDNA3.1-HIV-1 YU2 44-492, pcDNA3.1-HIV-1 YU2  $\Delta$ V1/V2, pcDNA3.1-HIV-1 YU2  $\Delta$ V3, pcDNA3.1-HIV-1  $\Delta$ V1/V2/V3 and pcDNA3.1-HIV-1 44-492 $\Delta$ V1/V2/V3 (core<sub>e</sub>), as previously described (6). Beginning one day after transfection, the cells were metabolically labeled for 16 h with 100  $\mu$ Ci/mL [<sup>35</sup>S]-methionine/cysteine ([<sup>35</sup>S] protein labeling mix (Perkin Elmer, Waltham, MA, USA) in Dulbecco's modified Eagle's medium lacking methionine and cysteine and supplemented with 5% dialyzed fetal bovine serum. The harvested culture supernatants were centrifuged at low speed to clear the cell debris, and the envelope glycoproteins were cross-linked as previously described (7). Briefly, clarified culture supernatants were incubated with 5 mM glutaraldehyde (GA) (Sigma) for 5 min at room temperature before addition of 50 mM glycine to quench the unreacted GA. The radiolabeled gp120 envelope glycoproteins (untreated or cross-linked) were precipitated with 2  $\mu$ g of different anti-gp120 monoclonal antibodies in the presence of 50  $\mu$ l of 10% Protein A-Sepharose (AmericanBioSciences, Blauvelt, NY, USA) for 1 hr at 37°C. All precipitated proteins were boiled for 5 min before being analyzed on NuPAGE Novex Bis-Tris polyacrylamide gels (Invitrogen, Carlsbad, CA, USA) under non-reducing conditions, as previously described (6).

**Viral stocks and neutralization assays.** HIV-1 Env-pseudoviruses were prepared by transfecting 293T cells ( $6 \times 10^6$  cells in 50 ml growth medium in a T-175 culture flask) with 10  $\mu$ g of *rev/env* expression plasmid and 30  $\mu$ g of an *env*-deficient HIV-1 backbone vector (pSG3 $\Delta$ env), using Fugene 6 transfection reagent (Invitrogen). Pseudovirus-containing culture supernatants were harvested two days after transfection, filtered (0.45  $\mu$ m), and stored at -80°C or in the vapor phase of liquid nitrogen. Neutralization was measured using HIV-1 Env-pseudoviruses to infect TZM-bl cells as described previously (8-11) with minor modifications. Briefly, the test reagent (sCD4, or test antibody, or NBD-556) was diluted in complete media containing 10% DMSO. Then 40  $\mu$ l of virus was incubated for 30 min at 37°C with 10  $\mu$ l of serial diluted test reagent in duplicate wells of a 96-well flat bottom culture plate. To keep assay conditions constant, sham media containing 10% DMSO was used in place of test reagent in specified control wells. The virus input was set at a multiplicity of infection of approximately 0.01-0.1, which generally results in 100,000 to 400,000 relative light units (RLU) in a luciferase assay (Promega, Madison, WI). The test reagent concentrations were defined at the point of incubation with virus supernatant. The molecular masses of 46 kDa for sCD4 and 150 kDa for test antibodies were used to convert concentrations from mg/ml to  $\mu$ M. Neutralization curves were fit by nonlinear regression using a 5-parameter hill slope

equation as previously described (10). The 50% inhibitory concentrations ( $IC_{50}$ ) were reported as the antibody concentrations required to inhibit infection by 50%.

**Surface plasmon resonance (SPR) experiments.** All SPR experiments were performed using Biacore T100 optical biosensor (GE Healthcare) at 25°C. Ligands (NBD556-hexylamine or d1d2 domain of sCD4) were immobilized (~6.5 or ~200 RU, respectively) on a CM5 sensor chip using standard amine coupling chemistry. The running buffer contained 10 mM Tris-HCl, pH 7.5, 350 mM NaCl, 0.02 %  $NaN_3$ , and 0.05% Surfactant P-20 (GE Healthcare). 10 mM glycine (pH 1.5) was used for regeneration of the surface of the CM5 sensor chip. For kinetic analysis, gp120 variants in an eight-sample concentration series using two-fold dilutions starting at 10  $\mu$ M were injected at 40  $\mu$ l/min. The association and dissociation phases were monitored for 60 seconds and 120 seconds, respectively. All kinetic data were extracted by fitting the responses globally with a 1:1 interaction model using Biacore T100 Evaluation software. For competition assay, ~4000 RU of anti-human IgG (Fc) antibody (GE Healthcare, Human Antibody Capture Kit) were immobilized on a CM5 chip. ~500 RU of soluble sCD4 were captured on the antibody and 100 nM of YU2 gp120 core<sub>e</sub> or gp120 full-length with 0, 5, 10, 25, 50, or 100  $\mu$ M of NBD-556 were injected onto it at 40  $\mu$ l/min. HBS-EP (GE Healthcare) buffer with 5% DMSO was used as the running buffer and all analytes for the competition assay were prepared to contain the same buffer. The association and dissociation phases were monitored for 120 seconds and 300 seconds, respectively, for the competition.

**Synthesis of NBD556-hexylamine.** All reactions were performed under a positive flow of nitrogen in flasks that were flame dried under vacuum. Aldrich SureSeal® anhydrous THF, DMF, and methylamine (33% in absolute ethanol) were used without further purification and stored under nitrogen. Silica gel (particle size 35-70  $\mu$ m, 220-440 mesh) was used for column chromatography. Analytical samples were further purified by reverse-phase HPLC (Symmetry Shield<sup>TM</sup> C18, 150 x 19 mm, 5  $\mu$ m, detection at 254 and 280 nm) eluting with a linear gradient of 20–90% MeOH in 0.05% TFA/H<sub>2</sub>O. High-resolution electrospray ionization (ESI) mass data were measured on a Waters LCT Premier time-of-flight (TOF) mass spectrometer. NMR experiments were conducted on Bruker AVANCE 400-MHz spectrometer using specified solvents at 298 K. FT-IR data were acquired using a Perkin Elmer Spectrum One FTIR Spectrometer with a Universal ATR Sampling attachment. N-( $\omega$ -Iodohexyl) phthalimide (12) and NBD-556 (13) were prepared using previously published methods.

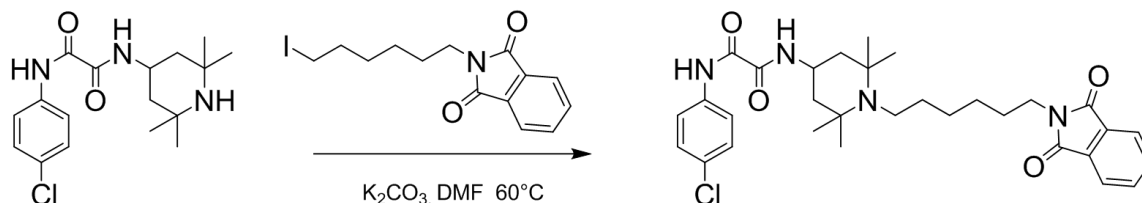

NBD-556 (0.15g, 0.4 mmol) and N-( $\omega$ -Iodohexyl) phthalimide (0.71 g, 2 mmol) were dissolved in 5ml of DMF followed by the addition of potassium carbonate (0.11 g, 0.8 mmol). The reaction mixture was left to stir at 60°C for 24 hrs. After cooling to room

temperature, water was added to the reaction. The mixture was then extracted with EtOAc and CH<sub>2</sub>Cl<sub>2</sub>. The organics were dried, concentrated and flash columned on silica gel with a gradient of 50% EtOAc/hexanes to 100% EtOAc giving the title compound as white solid in 35% yield. <sup>1</sup>H (400 MHz, CD<sub>3</sub>OD) δ 7.88-7.77 (m, 4H), 7.43 (d, *J*= 8.4 Hz, 2H), 7.28 (d, *J*= 8.4 Hz, 2H), 4.03 (m, 1H), 3.77 (t, *J*= 7.1 Hz, 2H), 3.64 (t, *J*= 7.4 Hz, 2H), 1.85-1.46 (m, 8H), 1.45-1.33 (m, 14H), 1.30 (t, *J*= 12.8Hz, 2H); <sup>13</sup>C (101 MHz, CD<sub>3</sub>OD) δ 170.0, 166.0, 165.0, 140.8, 135.5, 135.3, 133.5, 130.8, 130.7, 124.2, 58.5, 41.4, 41.3, 38.8, 30.7, 29.4, 28.3, 27.5, 27.2, 25.0; IR (film): ν<sub>max</sub>= 3061, 2940, 1773, 1712, 1672, 1493, 1397, 1203, 1134, 1039; HR-ESI-MS 567.2733 *m/z* [M+H]<sup>+</sup> (calculated for C<sub>23</sub>H<sub>37</sub>ClN<sub>4</sub>O<sub>2</sub>, 566.2660).

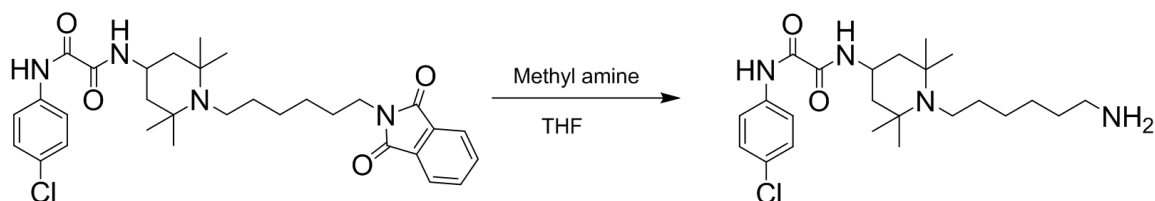

The NBD-556-phthalimide (0.5 g, 0.9 mmol) was dissolved in 5 ml THF. 1.5 ml of methyl amine in ethanol was added then left to stir at RT overnight. Reaction mixture was then evaporated under reduced pressure and columned on silica gel initially in 30% MeOH/CH<sub>2</sub>Cl<sub>2</sub> to remove impurities then ammonium hydroxide was added to the eluting solvent to make up 3% of the total volume. This solvent system elutes the title compounds as a colorless oil in 68% yield. <sup>1</sup>H (400 MHz, CD<sub>3</sub>OD) δ 7.45 (d, *J*= 8.6 Hz, 2H), 7.30 (d, *J*= 8.6 Hz, 2H), 4.03 (m, 1H), 3.79 (t, *J*= 7.2 Hz, 2H), 2.90 (t, *J*= 7.6 Hz, 2H), 1.71-1.42 (m, 8H), 1.45-1.34 (m, 14H), 1.28 (t, *J*= 13.0Hz, 2H); <sup>13</sup>C (101 MHz, CD<sub>3</sub>OD) δ 166.1, 165.1, 140.7, 135.5, 130.8, 58.5, 41.4, 41.3, 40.7, 30.7, 28.6, 28.2, 27.3, 27.1, 25.0; IR (neat): ν<sub>max</sub>= 3064, 2945, 2866, 1669, 1645, 1493, 1202, 1135,; HR-ESI-MS 437.2685 *m/z* [M+H]<sup>+</sup> (calculated for C<sub>23</sub>H<sub>37</sub>ClN<sub>4</sub>O<sub>2</sub>, 436.2605).

**Molecular morphs.** Structural transitions between unliganded gp120 core and antibody-bound states were modeled using adiabatic mapping [14]. Coordinates were linearly interpolated over 100 frames with each subject to 30 minimization steps with CNS [15]. Frames were rendered using the PyMOL Molecular Graphics System, Version 1.3, Schrödinger, LLC. and morphs displayed at 24 frames per second.

1. Zhou T, et al. (2007) Structural definition of a conserved neutralization epitope on HIV-1 gp120. *Nature* 445:732-737.
2. Otwinowski Z, Minor W (1997) Processing of X-ray diffraction data collected in oscillation mode. *Methods Enzymol.* 276:307-326.
3. McCoy AJ, et al. (2007) Phaser crystallographic software. *J. Appl. Crystallogr.* 40:658-674.
4. Adams PD, et al. (2002) PHENIX: building new software for automated

- crystallographic structure determination. *Acta Crystallogr. D* 58:1948-1954.
5. Emsley P, Cowtan K (2004) Coot: model-building tools for molecular graphics. *Acta Crystallogr. D* 60:2126-2132.
  6. Finzi A, et al. (2010) Conformational characterization of aberrant disulfide-linked HIV-1 gp120 dimers secreted from overexpressing cells. *J. Virol. Methods* 168(1-2):155-161.
  7. Yuan W, et al. (2006) Characterization of the multiple conformational states of free monomeric and trimeric human immunodeficiency virus envelope glycoproteins after fixation by cross-linker. *J. Virol.* 80:6725-6737.
  8. Li M, et al. (2005) Human Immunodeficiency Virus Type 1 env Clones from Acute and Early Subtype B Infections for Standardized Assessments of Vaccine-Elicited Neutralizing Antibodies. *J. Virol.* 79:10108-10125.
  9. Li M, et al. (2006) Genetic and neutralization properties of subtype C human immunodeficiency virus type 1 molecular env clones from acute and early heterosexually acquired infections in Southern Africa. *J. Virol.* 80:11776-11790.
  10. Seaman MS, et al. (2010) Tiered categorization of a diverse panel of HIV-1 Env pseudoviruses for assessment of neutralizing antibodies. *J. Virol.* 84:1439-1452.
  11. Wu X, et al. (2009) Mechanism of human immunodeficiency virus type 1 resistance to monoclonal antibody b12 that effectively targets the site of CD4 attachment. *J. Virol.* 83:10892-10907.
  12. Lukyanenko NG, et al. (2004) Synthesis of lariat diazacrown ethers with terminal amino groups in the side chains. *Chem. Heterocycl. Compd.* 40:343-350.
  13. Schon A, et al. (2006) Thermodynamics of binding of a low-molecular-weight CD4 mimetic to HIV-1 gp120. *Biochemistry* 45:10973-10980.
  14. Krebs WG, Gerstein (2000) The morph server: a standardized system for analyzing and visualizing macromolecular motions in a database framework. *Nucleic acids research* 28:1665-1675.
  15. Brunger AT, et al. (1998) Crystallography & NMR system: A new software suite for macromolecular structure determination. *Acta crystallographica. Section D, Biological crystallography* 54:905-921.

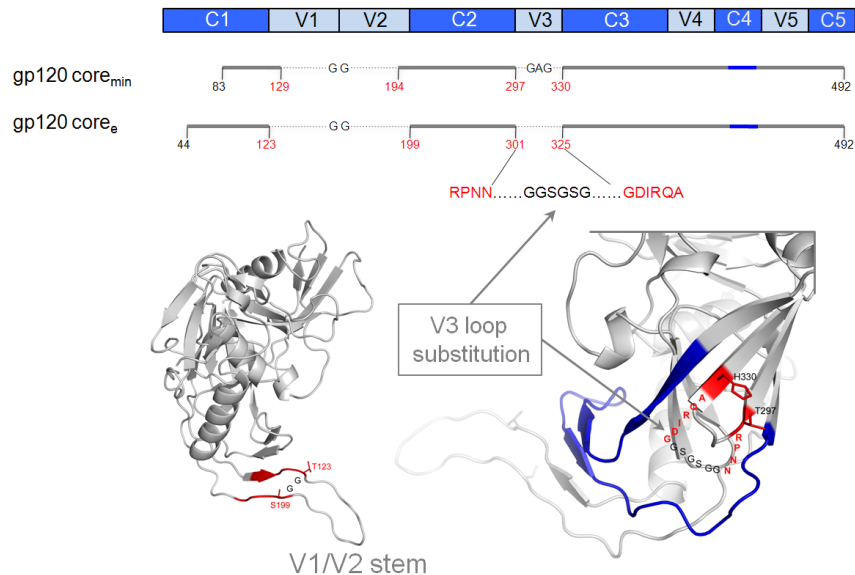

**Fig. S1.** Schematic diagram of the minimal core ( $\text{core}_{\text{min}}$ ) and extended core ( $\text{core}_{\text{e}}$ ) gp120 constructs.  $\text{Core}_{\text{min}}$  spans residue 83 (N terminus) to 492 where the V1V2 region (129-194) is replaced with GG and the V3 region (297-330) is replaced with GAG.  $\text{Core}_{\text{e}}$  spans residue 44 to 492. Its V1V2 region (123-199) is replaced with GG and the V3 region (301-325) is replaced with GGSGSG.

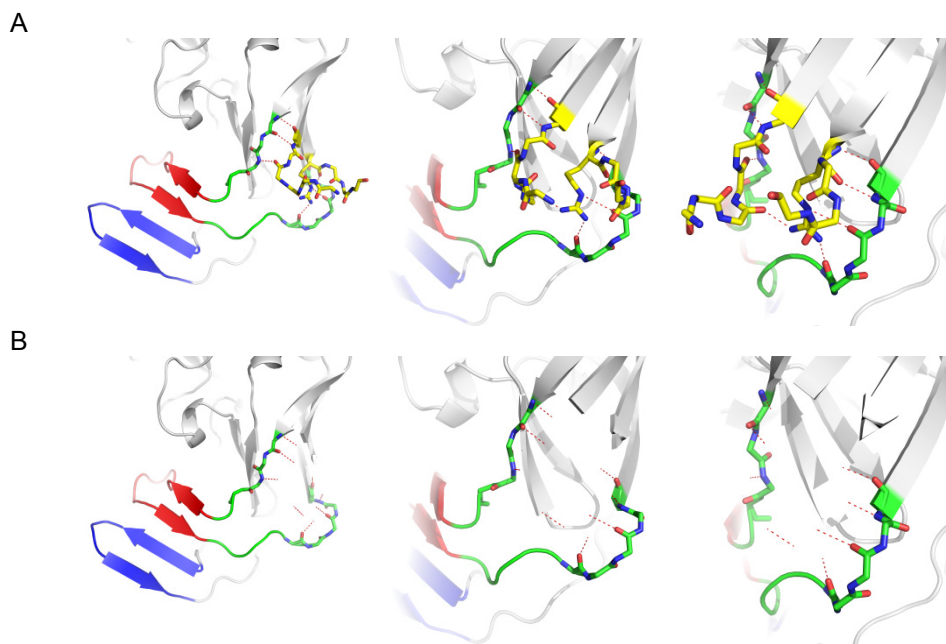

**Fig. S2.** Residues in gp120  $\text{core}_{\text{e}}$  V3 stem region (stick representation in yellow), which are missing in the  $\text{core}_{\text{min}}$ , form hydrogen bonds with the neighboring residues on the proximal and distal region of  $\beta 20/21$  (stick representation in green). (A) Close-up view of the V3 stem region of unliganded clade  $E_{93\text{TH}057}$   $\text{core}_{\text{e}}$  from three different angles. Three pairs of hydrogen bonds in the proximal region and four pairs of hydrogen bonds in the distal region of  $\beta 20/21$  stabilize the V3 stem region. The structure and biochemical data suggest that absence of the residues (drawn in yellow) in the  $\text{core}_{\text{min}}$ , which is modeled in (B), destabilizes the region to effect a bridging sheet (drawn in red and blue) conformation different from that found in the unliganded  $\text{core}_{\text{e}}$  and the CD4-bound gp120.



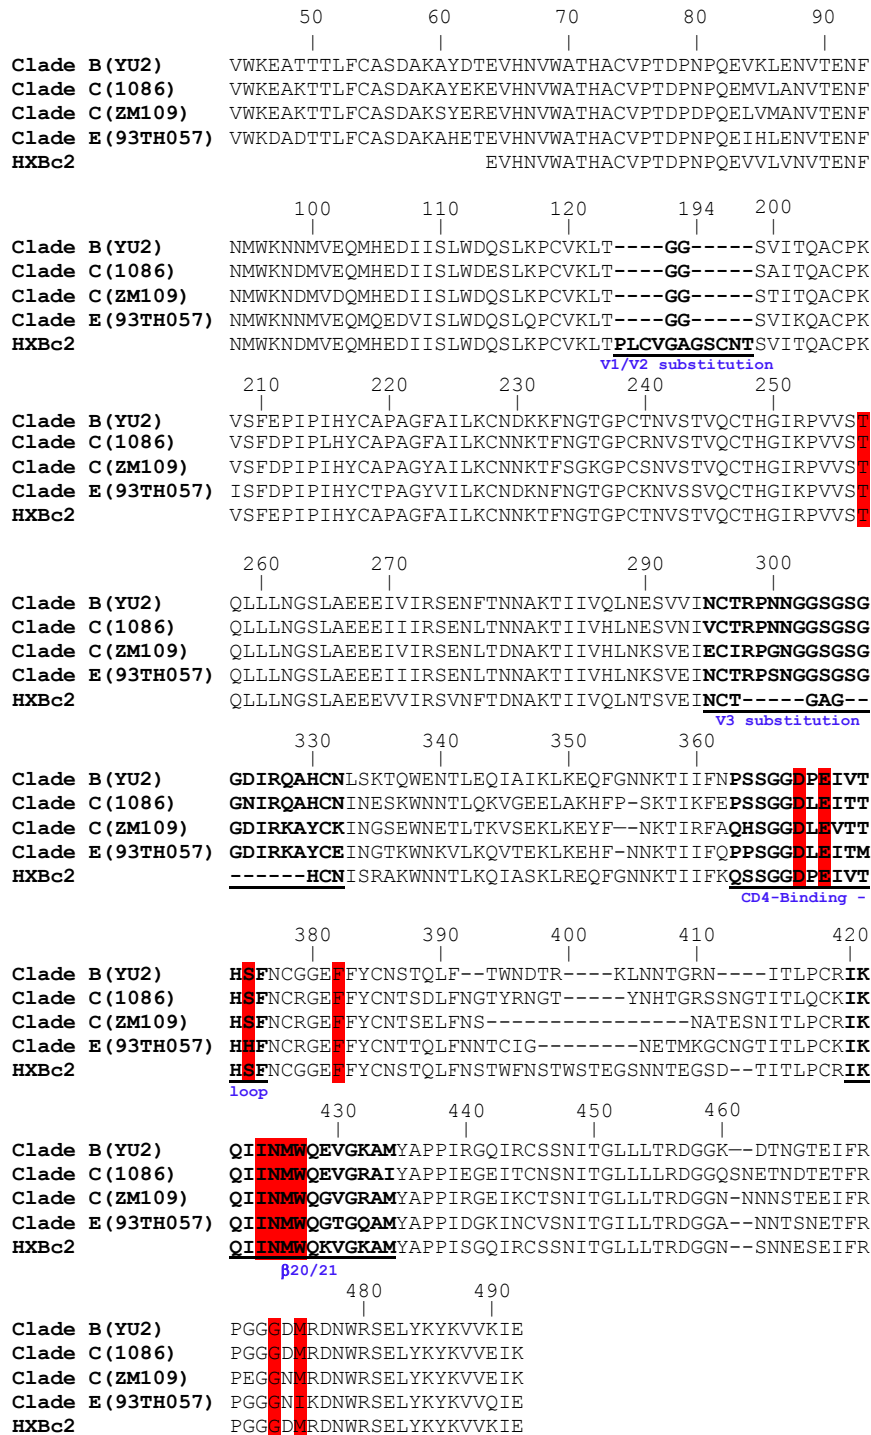

**Fig. S3.** Sequence alignment of HIV-1 clade B, C, and E gp120 cores. Clade B<sub>YU2</sub>, clade C<sub>1086</sub>, clade C<sub>ZM109</sub>, and clade E<sub>93TH057</sub> gp120 core<sub>e</sub> sequences are aligned with HXBc2 gp120 core<sub>min</sub>. Residues are numbered according to current convention, in reference to the HXBc2 numbers. The clade B<sub>YU2</sub>, and clade C<sub>1086</sub>, clade C<sub>ZM109</sub>, and clade E<sub>93TH057</sub> core<sub>e</sub> constructs have a shorter V1/V2 stem and a longer V3 stem compared with those of the core<sub>min</sub> construct. The key residues lining the NBD-556 binding pocket are highlighted in red.

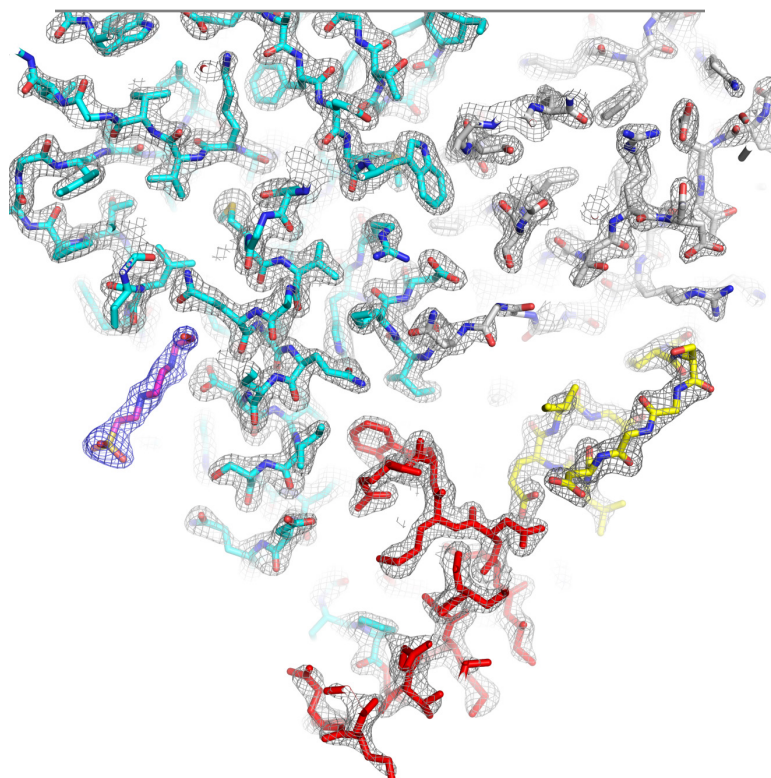

**Fig. S4.** *2fo-fc* map of clade E<sub>93TH057</sub> unliganded HIV-1 gp120 core<sub>e</sub> contoured at 1.5 $\sigma$ . Part of the inner domain, outer domain, CD4 binding loop, and bridging sheet of gp120 core<sub>e</sub> are colored in cyan, grey, yellow, and red, respectively. A HEPES molecule (purple) originated from the crystallization buffer occupies the well-defined electron density (blue mesh).

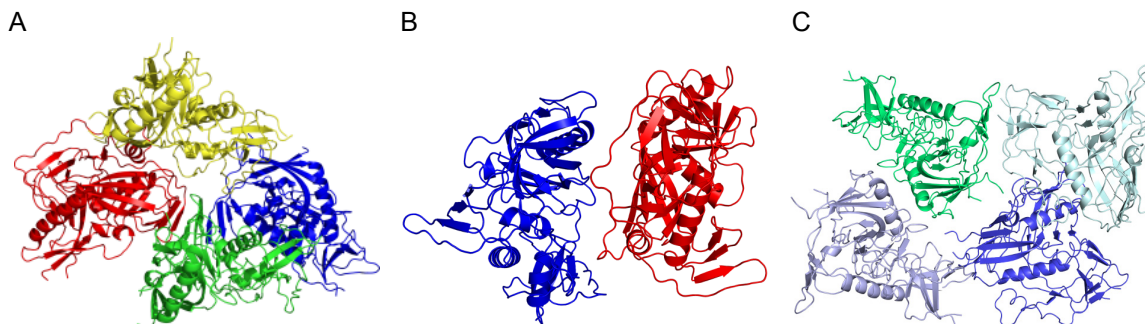

**Fig. S5.** Molecules found in the asymmetric unit of clade B<sub>YU2</sub>, clade C<sub>1086</sub>, and clade C<sub>ZM109F.PB4</sub> core<sub>e</sub> crystals. (A) A clade B<sub>YU2</sub> core<sub>e</sub> crystal contains four gp120 molecules in the asymmetric unit in P6<sub>5</sub> packing. (B) The clade C<sub>1086</sub> and (C) clade C<sub>ZM109F.PB4</sub> core<sub>e</sub> crystals contain two molecules in the asymmetric unit in C222<sub>1</sub> packing and four molecules in the asymmetric unit in P2<sub>1</sub> packing, respectively.

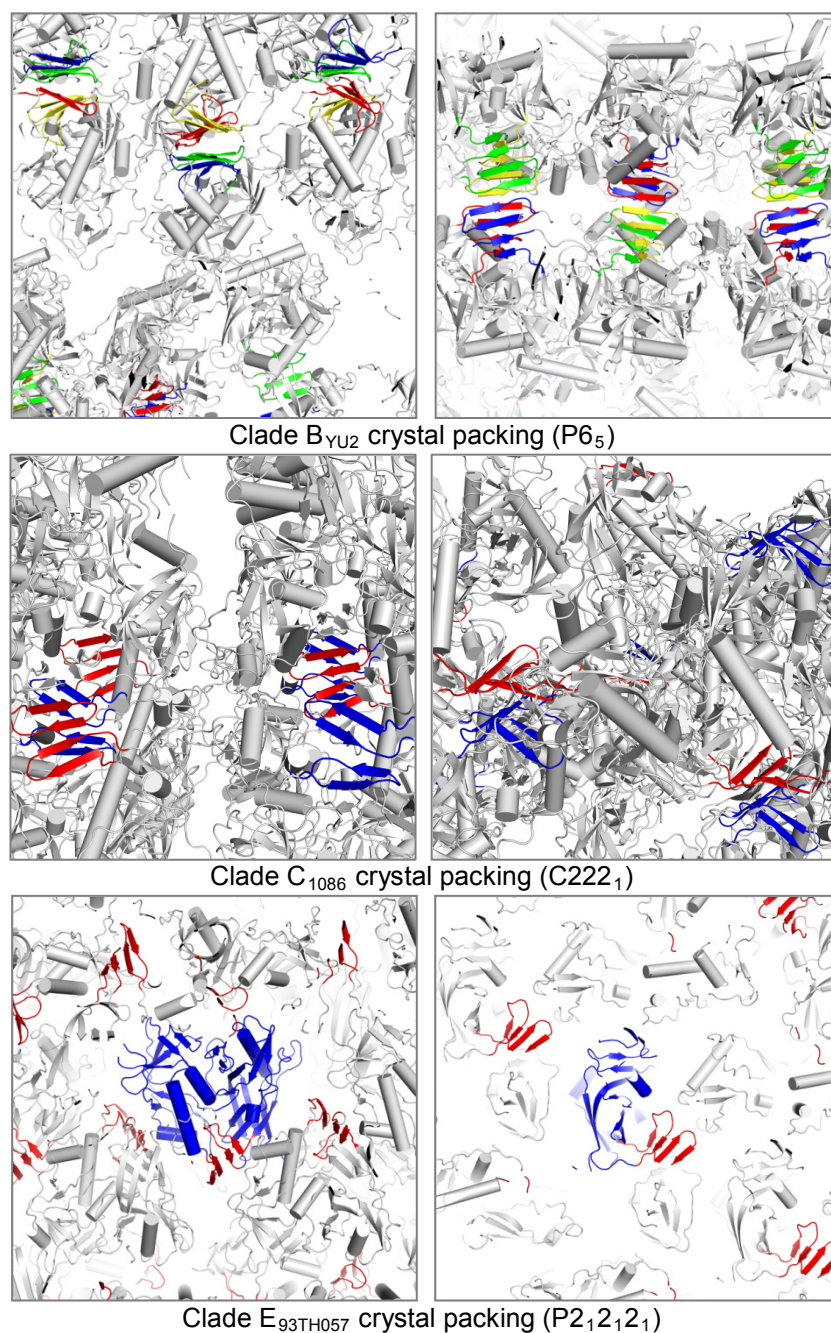

**Fig. S6.** Crystal packing of unliganded clade B, C, and E core. One of the surprising findings in the unliganded structures is the conformation of the bridging sheet, which is the same as that found in the CD4-bound conformation. Hence, we considered the possibility that the conformation was influenced by crystal lattice contacts. As shown in the P6<sub>5</sub> packing of clade B<sub>YU2</sub> and C222<sub>1</sub> of clade C<sub>1086</sub>, bridging sheets (highlighted in color) are in close proximity and making lattice contacts. The bridging sheets shown in P2<sub>1</sub>2<sub>1</sub>2<sub>1</sub> packing of the unliganded clade E<sub>93TH057</sub>, however, do not make any lattice contacts. This suggests that the bridging sheet found in the unliganded structures enhanced the crystal lattice contacts, rather than the lattice contact inducing the conformation.

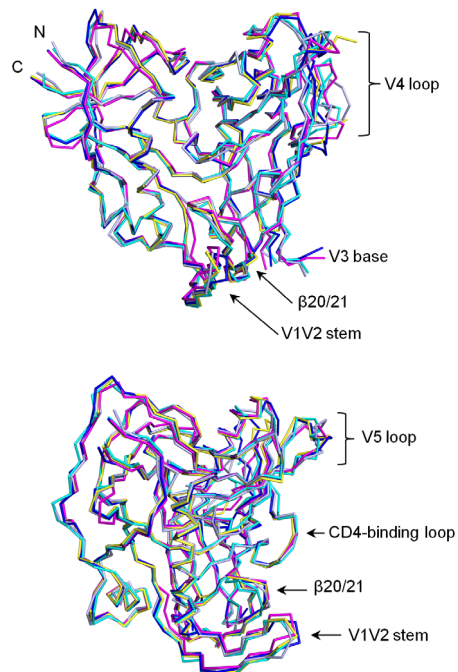

**Fig. S7.** Superposition of four unliganded and CD4-bound gp120 core<sub>c</sub> structures. The C $\alpha$  trace of CD4- and 48d-bound (yellow), unliganded clade B<sub>YU2</sub> (magenta), unliganded clade C<sub>1086</sub> (blue), unliganded clade C<sub>ZM109F.PB4</sub> (light blue), and unliganded clade E<sub>93TH057</sub> (cyan) HIV-1 gp120 cores are superposed. Two perspectives are shown to highlight the most varied regions, the V4 and V5 loops.

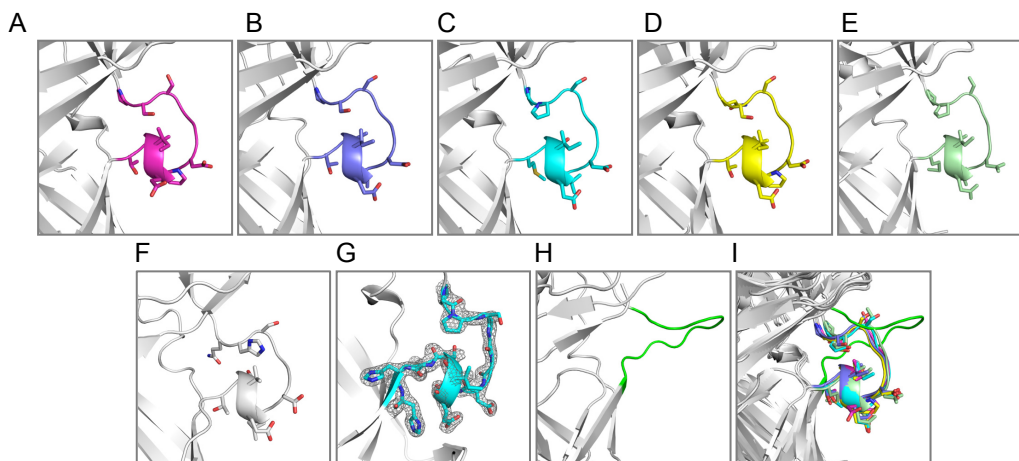

**Fig. S8.** CD4-binding loops of gp120s. (A) unliganded clade B<sub>YU2</sub>, (B) unliganded clade C<sub>1086</sub>, (C) unliganded clade E<sub>93TH057</sub>, (D) CD4- and 48d-bound, (E) VRC01-bound, (F) unliganded clade C<sub>ZM109F.PB4</sub>, (G) unliganded clade E<sub>93TH057</sub> in electron density contoured at 1.5 $\sigma$ , (H) unliganded SIV core<sub>min</sub>, (I) superposition of the loops. All CD4-binding loops of HIV-1 unliganded gp120s are well superposed to those of CD4-bound and VRC01-bound gp120. Conformation of CD4-binding loop of unliganded SIV gp120, however, is markedly different.

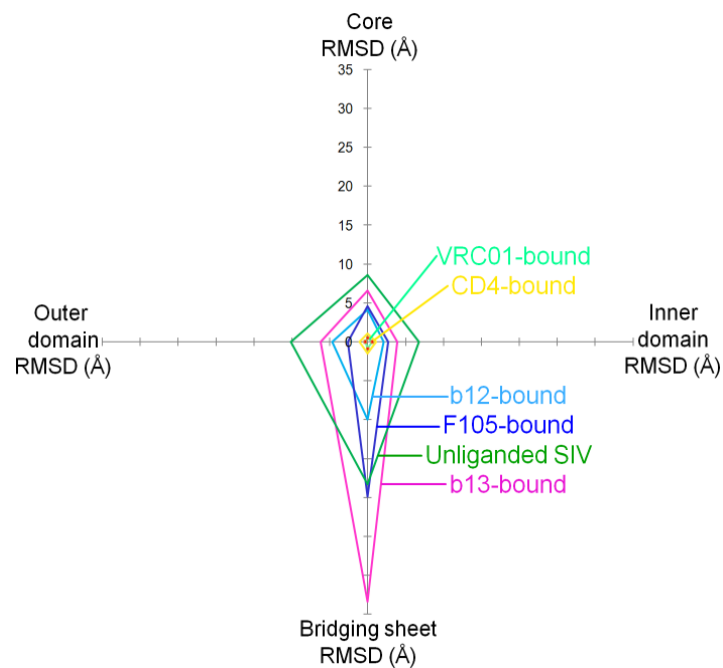

**Fig. S9.** Structural variation in HIV-1 gp120, relative to the unliganded clade E core<sub>e</sub> structure, overall and by domain. Each axis represents the coordinate deviation for the core, the inner domain, the outer domain, or the bridging sheet. Lines, drawn in the same color as the inner domains of the molecules shown in (Fig. 2A), display the rmsds for those molecules relative to the unliganded clade E core<sub>e</sub> structure.

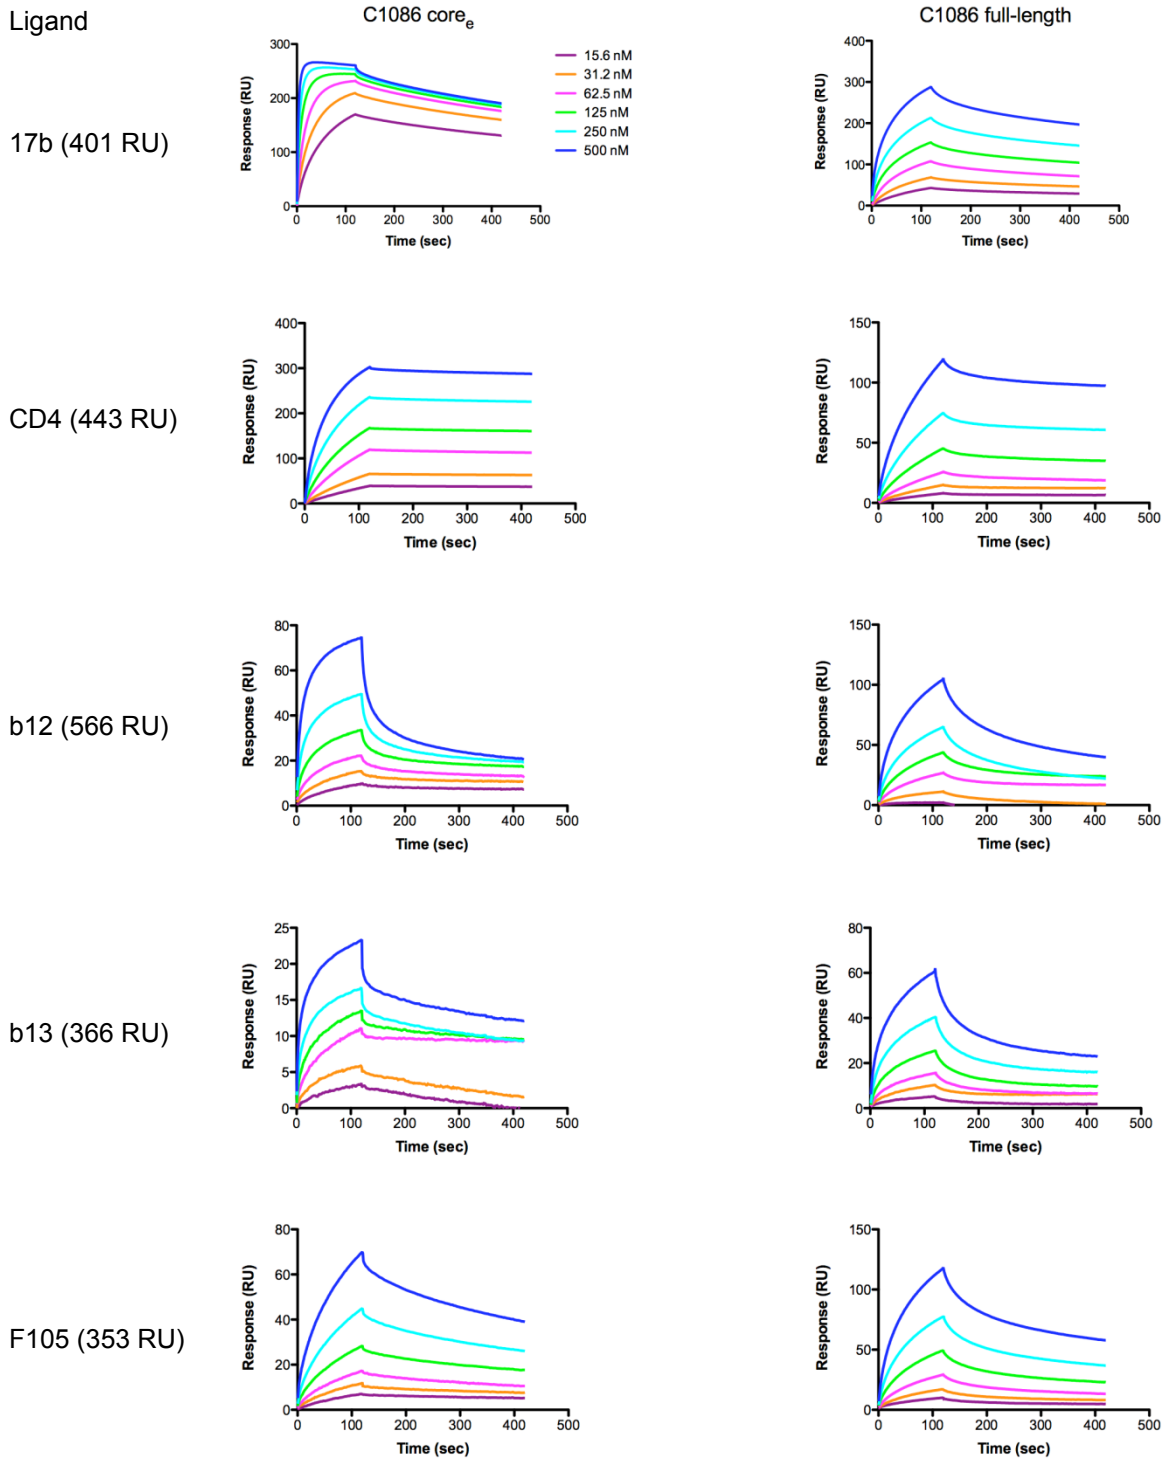

**Fig. S10.** SPR measurements of the 17b-purified C1086 core<sub>e</sub> and full-length gp120 binding to 17b and other antibodies. CD4 and antibodies were captured on anti-human IgG(Fc) antibody immobilized on a CM 5 chip, then core<sub>e</sub> and full-length gp120 in a six-concentration series using two-fold dilutions starting at 500 nM were passed over the sensor chip.

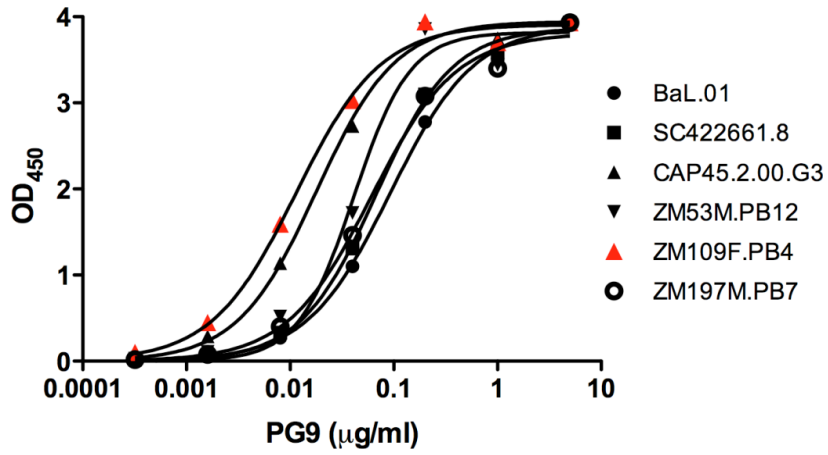

**Fig. S11.** High-affinity binding of PG9 to clade B and C gp120 monomers. Binding of PG9 to recombinant gp120 monomers from 30 clade B and C isolates was assessed by ELISA, and the binding of PG9 to the six monomers that showed the highest level of binding is shown here.

Clade B<sub>YU2</sub> gp120 core<sub>e</sub>(44-492 ΔV12/V3s)

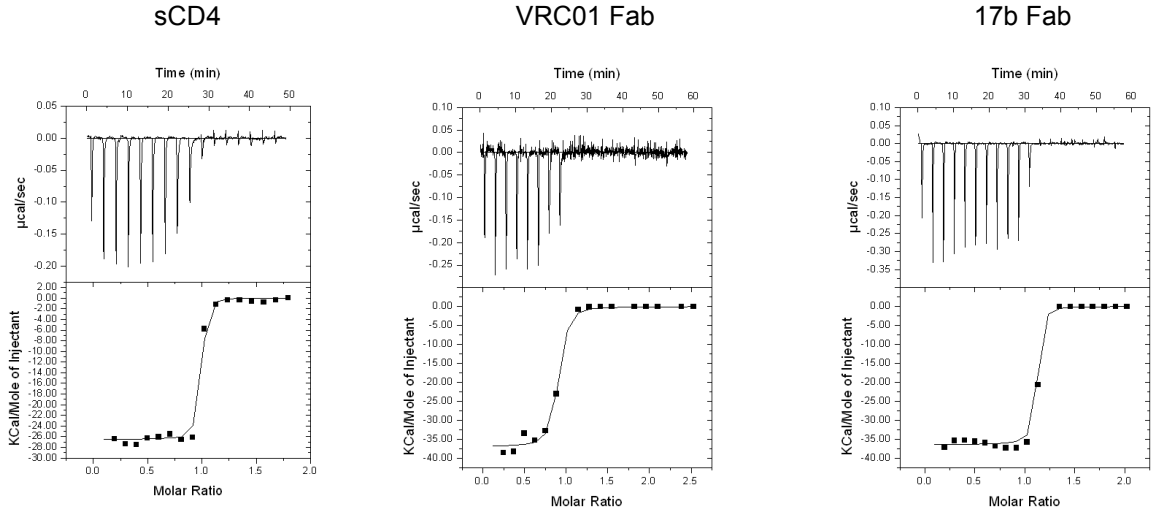

Clade B<sub>YU2</sub> gp120 full-length

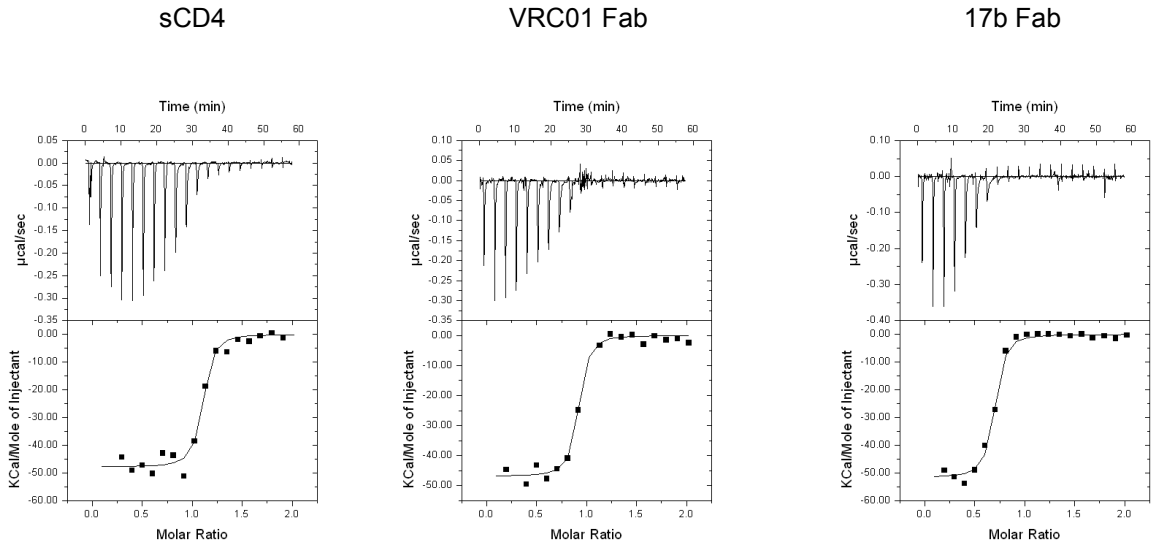

**Fig. S12.** Clade B<sub>YU2</sub> gp120-ligand binding thermodynamics. Calorimetry data for the titration of full-length and core<sub>e</sub> gp120 variants with sCD4, VRC01 Fab, and 17b Fab in 10 mM Na<sub>2</sub>HPO<sub>4</sub>, 200 mM NaCl (pH 7.4). The top panels show raw data in power versus time. The area under each spike is proportional to the heat produced at each injection. The lower panels show integrated areas normalized to the number of moles of sCD4, 17b Fab, or VRC01 Fab injected at each injection step.



Clade C<sub>1086</sub> gp120 core<sub>e</sub>(44-492 ΔV12/V3s)

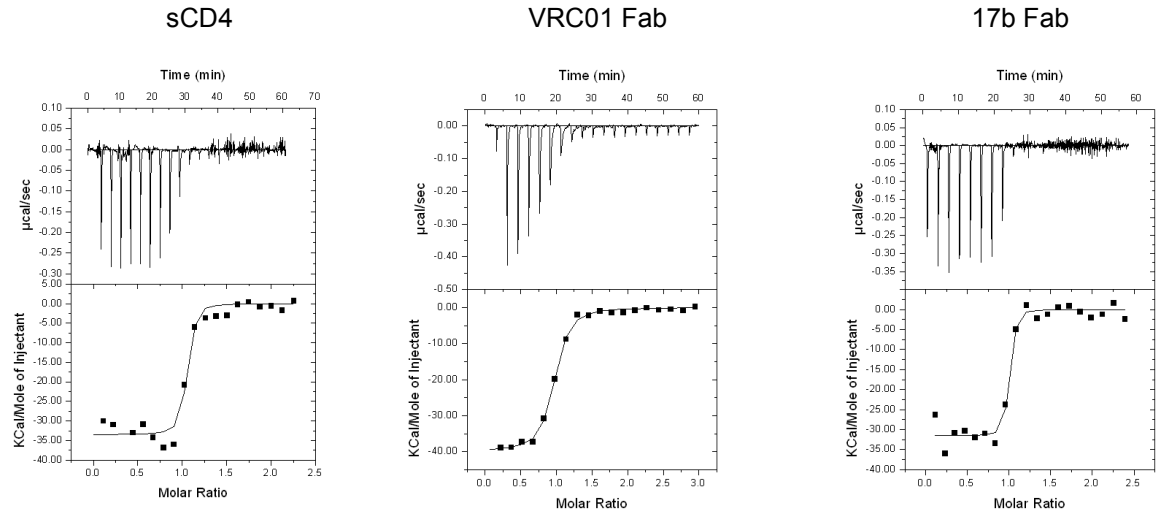

Clade C<sub>1086</sub> gp120 full-length

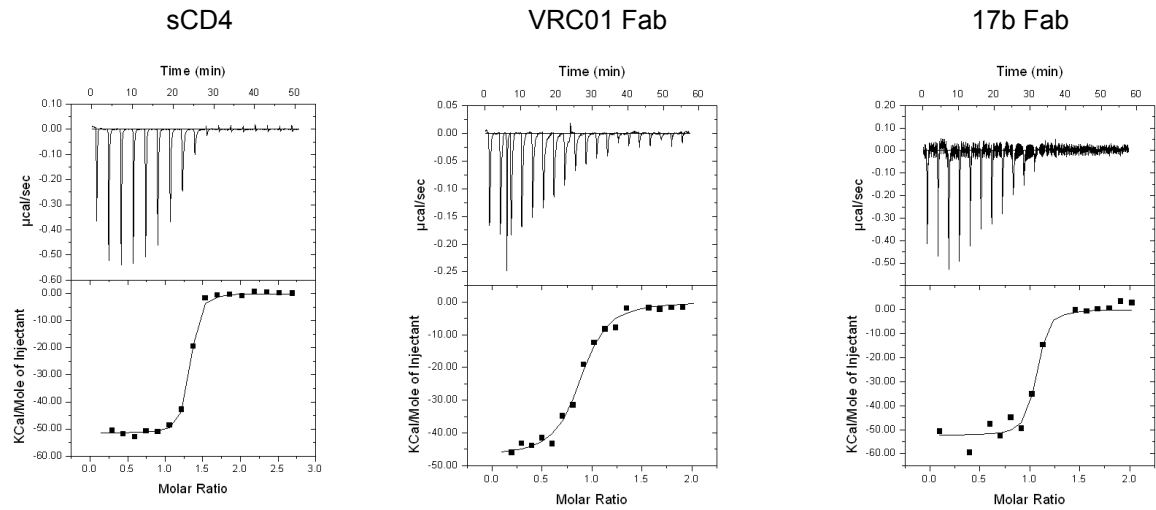

**Fig. S13.** Clade C<sub>1086</sub> gp120-ligand binding thermodynamics. Calorimetry data for the titration of full-length and core<sub>e</sub> gp120 variants with sCD4, VRC01 Fab, and 17b Fab in 10 mM Na<sub>2</sub>HPO<sub>4</sub>, 200 mM NaCl (pH 7.4). The top panels show raw data in power versus time. The area under each spike is proportional to the heat produced at each injection. The lower panels show integrated areas normalized to the number of moles of sCD4, 17b Fab, or VRC01 Fab injected at each injection step.

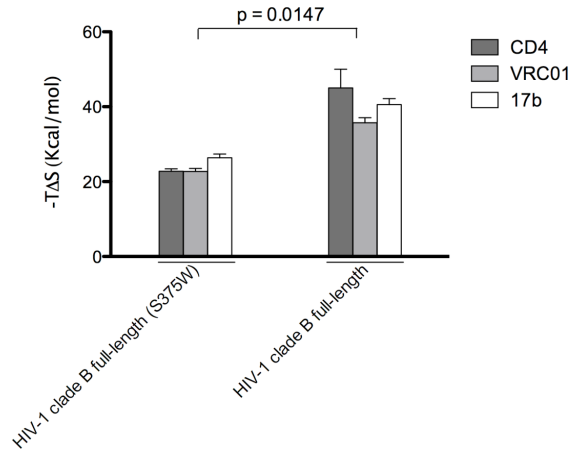

**Fig. S14.** Entropy of ligand interactions with HIV-1 clade B full-length gp120 and clade B full-length S375W. The entropy change on the S375W mutant gp120 interactions with CD4, VRC01, or 17b is about half of that observed for the full-length, wild-type gp120.

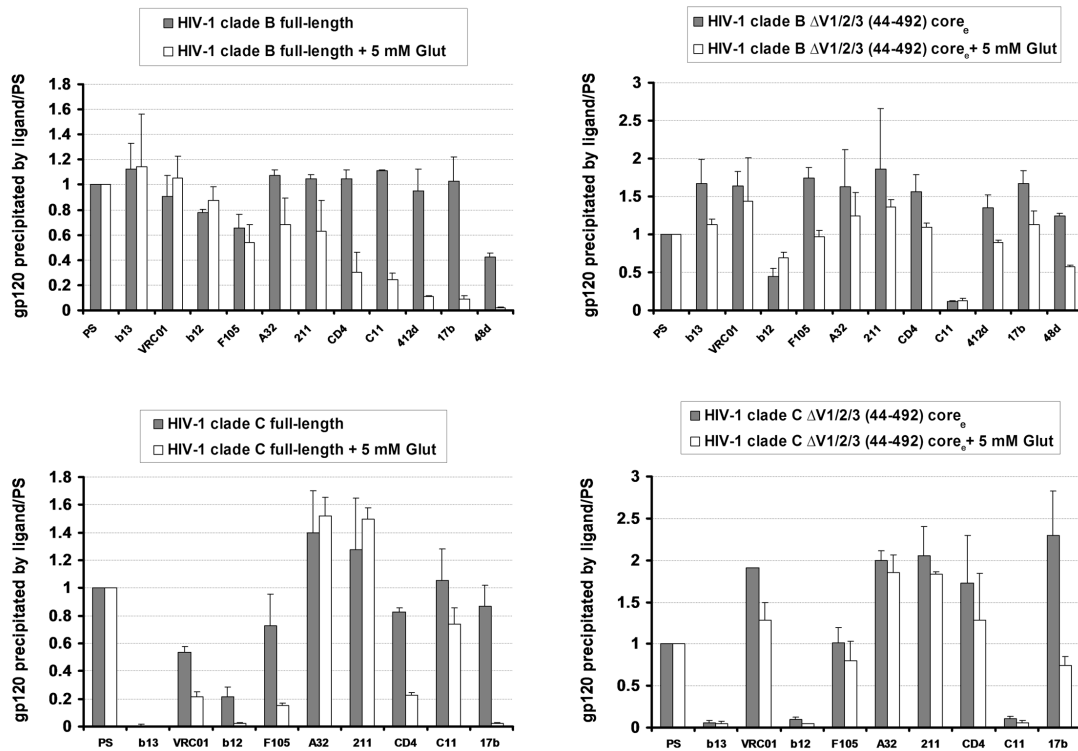

**Fig. S15.** Effect of loop deletion on antigen recognition. Radiolabeled clade B<sub>YU2</sub> and clade C<sub>1086</sub> full-length or core<sub>e</sub> HIV-1 gp120 glycoproteins were either untreated or cross-linked with 5 mM glutaraldehyde (Glut) before being precipitated with a panel of anti-gp120 monoclonal antibodies. The amount of protein precipitated was normalized to that precipitated by a polyclonal mixture of sera (PS) from HIV-1 infected individuals.

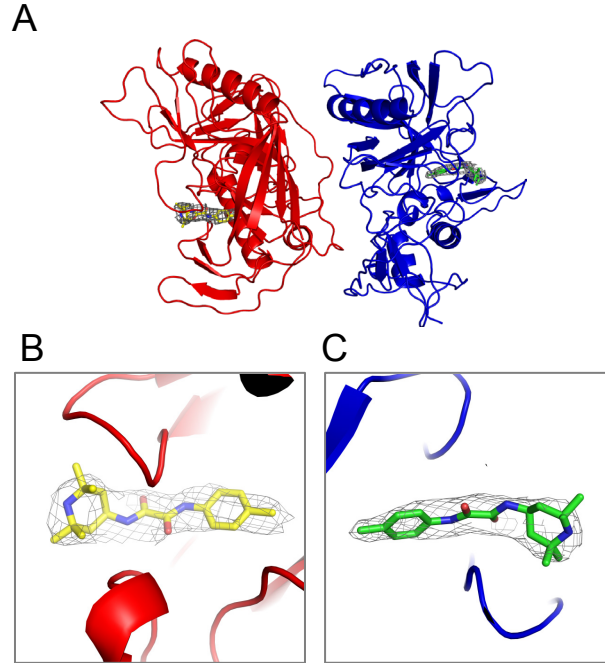

**Fig. S16.** Structure of NBD-556 bound  $C_{1086}$  gp120 core<sub>e</sub> in the asymmetric unit. (A) Two molecules of gp120 are found in the asymmetric unit of the  $C_{1086}$  gp120-NBD-556 crystals; these are colored red and blue and are shown in ribbon representation. Each of the “Phe43” binding cavities of the gp120 is filled with an NBD-556 molecule (displayed in stick representation). (B, C) Close-up of the NBD-556 molecules for each of the two copies in the asymmetric unit are shown with  $2Fo-Fc$  electron density contoured at  $1\sigma$ .

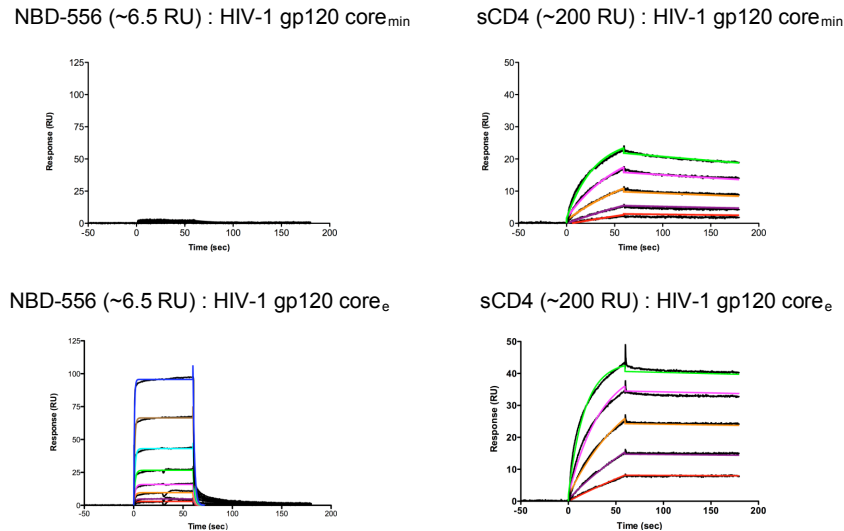

**Fig. S17.** Comparison of HIV-1 clade B<sub>YU2</sub> gp120 core<sub>min</sub> interactions with NBD-556 or sCD4 and gp120 core<sub>e</sub> with NBD-556 or sCD4. A stark contrast exists between gp120 core<sub>min</sub> and core<sub>e</sub> for their binding responses to NBD-556, whereas both cores recognize sCD4 with similar  $K_D$ 's. Colored lines represent the fit of the kinetic data to a 1:1 binding model. gp120 core<sub>min</sub> and core<sub>e</sub> were injected in an eight-sample concentration series using two-fold dilutions starting at  $10\ \mu\text{M}$ , and in a five-sample concentration series starting at  $1.25\ \mu\text{M}$  for sCD4.

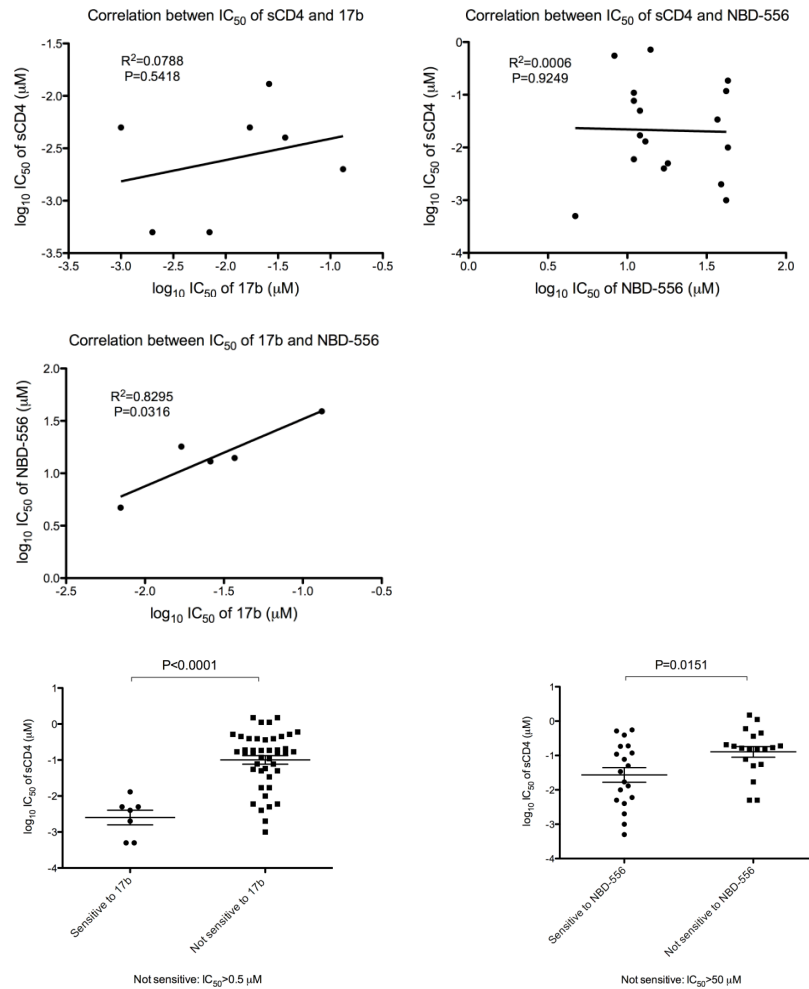

**Fig. S18.** Correlations between  $IC_{50}$  of sCD4, 17b, and NBD-556 against clade B and C viruses. The  $IC_{50}$  values of sCD4, NBD-556, and 17b against clade B and C reference viruses showed significant correlations only for NBD-556 and 17b. Viruses sensitive to 17b or NBD-556 were more sensitive to sCD4 than those not sensitive to 17b or NBD-556.

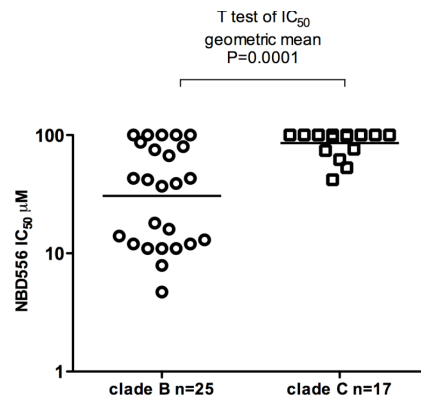

**Fig. S19.** Geometric mean of  $IC_{50}$  of NBD-556 against clade B and C reference viruses. Overall, clade B viruses are more sensitive to NBD-556 than clade C viruses.

**Table S1. Crystallization screening results for gp120 core<sub>e</sub> proteins and co-crystallization with NBD-556 are summarized.**

| HIV-1 Strain                    | Expression | Purification  | Crystals | Data (Å) |
|---------------------------------|------------|---------------|----------|----------|
| Clade B <sub>YU2</sub>          | 293fs      | 17b/ConA/S200 | X        | 3.4      |
| Clade E <sub>93TH057</sub>      | 293fs      | 17b/ConA/S200 | X        | 1.9      |
| AB253428 <sup>1</sup>           | 293fs      | 17b/ConA/S200 | X        | --       |
| C97ZA                           | 293fs      | 17b/ConA/S200 | X        | --       |
| VRC-A                           | 293fs      | 17b/ConA/S200 | --       | --       |
| AF082394 <sup>1</sup>           | 293fs      | 17b/ConA/S200 | --       | --       |
| EF165541 <sup>1</sup>           | GnTi       | 17b/ConA/S200 | --       | --       |
| Clade C <sub>1086</sub>         | GnTi       | 17b/ConA/S200 | X        | 2.8      |
| Clade C <sub>ZM109E.PB4</sub>   | GnTi       | 17b/ConA/S200 | X        | 4.0      |
| AJ249239 <sup>1</sup>           | GnTi       | 17b           | --       | --       |
| VRC-B                           | GnTi       | 17b/ConA/S200 | --       | --       |
| AY046058 <sup>1</sup>           | GnTi       | 17b           | --       | --       |
| AF457052 <sup>1</sup>           | GnTi       | 17b/ConA/S200 | --       | --       |
| Clade C <sub>1086</sub> :NBD556 | GnTi       | 17b/ConA/S200 | X        | 3.0      |

<sup>1</sup> Accession number 17b: 17b IgG conjugated-protein A column, ConA: concanavalin A column, S200: Superdex 200 size exclusion column.

**Table S2. Summary of X-ray crystallographic data and model refinement statistics**

| <b>Data Collection</b>                      |                        |                         |                               |                                   |                                               |
|---------------------------------------------|------------------------|-------------------------|-------------------------------|-----------------------------------|-----------------------------------------------|
| gp120                                       | Clade B <sub>YU2</sub> | Clade C <sub>1086</sub> | Clade C <sub>ZM109F.PB4</sub> | Clade C <sub>1086</sub> : NBD-556 | Clade E <sub>93TH057</sub>                    |
| Resolution (Å)                              | 50-3.4(3.5-3.4)        | 50-2.8(2.9-2.8)         | 50-4.0(4.14-4.0)              | 45.3-2.7(2.8-2.7)                 | 50-1.9(1.93-1.9)                              |
| Space group                                 | P6 <sub>5</sub>        | C222 <sub>1</sub>       | P12 <sub>1</sub> 1            | C222 <sub>1</sub>                 | P2 <sub>1</sub> 2 <sub>1</sub> 2 <sub>1</sub> |
| Wavelength (Å)                              | 1.0                    | 1.0                     | 1.0                           | 1.0                               | 1.0                                           |
| Molecule per ASU                            | 4                      | 2                       | 4                             | 2                                 | 1                                             |
| Unit cell constants (Å)                     |                        |                         |                               |                                   |                                               |
| a                                           | 222.9                  | 67.8                    | 55.6                          | 66.9                              | 63.5                                          |
| b                                           | 222.9                  | 127.5                   | 197.2                         | 126.0                             | 66.9                                          |
| c                                           | 86.4                   | 193.0                   | 83.4                          | 191.4                             | 88.0                                          |
| α, β, γ (°)                                 | 90, 90, 120            | 90, 90, 90              | 90, 91.3, 90                  | 90, 90, 90                        | 90, 90, 90                                    |
| Completeness (%)                            | 93.6(70.0)             | 93.8(82.4)              | 84.8(57.8)                    | 74.0(26.3)                        | 98.3(86.5)                                    |
| No. of total reflections                    | 186,054                | 84,043                  | 42,517                        | 91,321                            | 208,725                                       |
| No. of unique reflections                   | 31,621                 | 20,001                  | 12,925                        | 17,560                            | 30,907                                        |
| Redundancy                                  | 4.9(2.5)               | 4.2(2.5)                | 3.3(2.5)                      | 5.2(3.6)                          | 6.8(5.5)                                      |
| R <sub>sym</sub> (%) <sup>1</sup>           | 12.0                   | 7.9                     | 15.1                          | 11.6                              | 6.2                                           |
| I/σ                                         | 15.9(2.0)              | 29.7(3.8)               | 6.9(2.1)                      | 26.2(4.8)                         | 38.5(2.0)                                     |
| <b>Refinement Statistics ( F  &gt; 0 σ)</b> |                        |                         |                               |                                   |                                               |
| Resolution (Å)                              | 48.2-3.4               | 20-2.8                  | 42-4.0                        | 45.3-2.7                          | 28.7-1.9                                      |
| No. of reflections                          | 31,870                 | 19,503                  | 11,816                        | 17,156                            | 29,250                                        |
| R <sub>cryst</sub> (%) <sup>2</sup>         | 27.7                   | 22.3                    | 28.3                          | 23.9                              | 18.9                                          |
| R <sub>free</sub> (%) <sup>3</sup>          | 31.2                   | 28.1                    | 31.2                          | 29.5                              | 23.0                                          |
| Average B-value                             | 97.3                   | 76.6                    | 139.5                         | 70.7                              | 48.6                                          |
| RMSD bonds (Å)                              | 0.002                  | 0.002                   | 0.003                         | 0.007                             | 0.007                                         |
| RMSD angles (°)                             | 0.578                  | 0.607                   | 0.601                         | 0.669                             | 1.148                                         |
| Ramachandran plot                           |                        |                         |                               |                                   |                                               |
| Favored (%)                                 | 95.1                   | 95.4                    | 92.2                          | 91.7                              | 96.7                                          |
| Allowed (%)                                 | 99.7                   | 99.9                    | 99.3                          | 100.0                             | 100.0                                         |
| PDB ID                                      | 3TGQ                   | 3TGR                    | 3TIH                          | 3TGS                              | 3TGT                                          |

<sup>1</sup>  $R_{\text{sym}} = \sum |I - \langle I \rangle| / \sum \langle I \rangle$ ; I is the intensity of an individual measurement and  $\langle I \rangle$  its mean value. <sup>2</sup>  $R_{\text{cryst}} = \sum |F_o - F_c| / \sum |F_o|$ ; F<sub>o</sub> and F<sub>c</sub> are observed and calculated structure factors, respectively. <sup>3</sup> R<sub>free</sub>: same as R<sub>cryst</sub> but calculated for a subset of the reflections (5%), which were omitted during the refinement and used to monitor its convergence.

**Table S3. Structural comparison of unliganded clade B<sub>YU2</sub> gp120 and gp120s in other crystalline lattices and bound by other ligands<sup>1</sup>**

| Clade      | Ligand(s)       | PDB               | Chain | RMSD <sub>com</sub> (Å) | RMSD <sub>ID</sub> (Å) | RMSD <sub>OD</sub> (Å) | RMSD <sub>BS</sub> (Å) |
|------------|-----------------|-------------------|-------|-------------------------|------------------------|------------------------|------------------------|
| B (HXBc2)  | CD4, 48d        | 3JWO              | A     | 0.75                    | 0.90                   | 0.92                   | 1.07                   |
| B (HXBc2)  | CD4, 48d        | 3JWD              | A     | 0.76                    | 0.91                   | 0.94                   | 1.06                   |
| B (HXBc2)  | CD4, 17b        | 2NXY              | A     | 0.77                    | 0.87                   | 0.93                   | 0.96                   |
| B (HXBc2)  | CD4, 17b        | 2NXZ              | A     | 0.76                    | 0.88                   | 0.94                   | 0.91                   |
| B (YU2)    | CD4, 412d       | 2QAD              | A     | 0.73                    | 0.93                   | 0.72                   | 1.32                   |
| B (HXBc2)  | CD4, 17b        | 1G9M              | G     | 0.83                    | 1.09                   | 0.89                   | 0.90                   |
| B (HXBc2)  | CD4, 17b        | 1G9N              | G     | 0.72                    | 0.80                   | 0.92                   | 0.62                   |
| B (JR-FL)  | CD4, X5         | 2B4C              | G     | 0.79                    | 0.95                   | 0.93                   | 0.88                   |
| B (YU2)    | F23, 17b        | 1YYM              | G     | 0.78                    | 0.86                   | 1.04                   | 1.04                   |
| B (HXBc2)  | CD4, 17b        | 1RZJ              | G     | 0.82                    | 1.07                   | 0.97                   | 0.90                   |
| B (YU2)    | CD4, 17b        | 1RZK              | G     | 0.74                    | 0.81                   | 0.94                   | 0.63                   |
| B (YU2)    | CD4M33, 17b     | 1YYL              | G     | 0.82                    | 0.92                   | 1.06                   | 1.09                   |
| B (YU2)    | [Phe23]M47, 17b | 2I60              | G     | 0.76                    | 0.88                   | 1.05                   | 0.98                   |
| B (YU2)    | CD4M47, 17b     | 2I5Y              | G     | 0.81                    | 0.94                   | 1.05                   | 0.95                   |
| B (HXBc2)  | CD4, 17b        | 1GC1              | G     | 1.32                    | 1.51                   | 1.59                   | 1.73                   |
| C (CAP210) | CD4, 21c        | 3LQA <sup>2</sup> | G     | 2.03                    | 1.34                   | 2.48                   | 1.42                   |
| B (HXBc2)  | b12             | 2NY7              | G     | 4.25                    | 4.85                   | 2.16                   | 10.33                  |
| B (YU2)    | F105            | 3HI1              | G     | 4.78                    | 2.71                   | 2.77                   | 20.34                  |
| B (HXBc2)  | b13             | 3IDX              | G     | 6.60                    | 6.26                   | 3.86                   | 33.76                  |
| SIV        | Unliganded      | 2BF1 <sup>2</sup> | A     | 8.42                    | 9.89                   | 6.89                   | 17.44                  |
| C1086      | Unliganded      | 3TGR              | A     | 0.80                    | 0.97                   | 0.72                   | 1.14                   |
| E(93TH057) | Unliganded      | 3TGT              | A     | 1.12                    | 1.10                   | 1.16                   | 1.60                   |
| C(ZM109)   | Unliganded      | 3TIH              | A     | 1.16                    | 1.05                   | 1.25                   | 1.46                   |
| E(93TH057) | VRC01           | 3NGB              | A     | 1.12                    | 1.09                   | 1.08                   | 1.91                   |

<sup>1</sup> C $\alpha$ -RMSDs of a set of common residues shared by all gp120s (RMSD<sub>com</sub>), of inner domain (RMSD<sub>ID</sub>), of outer domain (RMSD<sub>OD</sub>) and of bridging sheet (RMSD<sub>BS</sub>) were calculated after each of the gp120 structures was superimposed on the VRC01-bound gp120 structure. The common set consists of 253 residues, including residues 90-120, 204-205, 215-298, 329-355, 357-392, 395, 413-469 and 473-489. The inner domain (ID) contains three segments, residues 83-118, 206-252 and 476-492. The outer domain (OD) contains three segments, residues 253-397, 410-419 and 437-475. The bridging sheet contains two regions, residues 118-205 and 421-437.

<sup>2</sup> For 3LQA, which has adopted a different residue numbering, and 2BF1, which is the gp120 from SIV, sequence alignment with 1G9M is used to derive the standard HXBc2 numbering.

**Table S4. Structural comparison of unliganded clade C<sub>1086</sub> gp120 and gp120s in other crystalline lattices and bound by other ligands<sup>1</sup>**

| Clade      | Ligand(s)       | PDB               | Chain | RMSD <sub>com</sub> (Å) | RMSD <sub>ID</sub> (Å) | RMSD <sub>OD</sub> (Å) | RMSD <sub>BS</sub> (Å) |
|------------|-----------------|-------------------|-------|-------------------------|------------------------|------------------------|------------------------|
| B (HXBc2)  | CD4, 48d        | 3JWO              | A     | 0.57                    | 0.53                   | 0.68                   | 0.83                   |
| B (HXBc2)  | CD4, 48d        | 3JWD              | A     | 0.58                    | 0.54                   | 0.69                   | 0.82                   |
| B (HXBc2)  | CD4, 17b        | 2NXY              | A     | 0.70                    | 0.94                   | 0.67                   | 1.07                   |
| B (HXBc2)  | CD4, 17b        | 2NXZ              | A     | 0.71                    | 0.94                   | 0.67                   | 1.06                   |
| B (YU2)    | CD4, 412d       | 2QAD              | A     | 0.84                    | 1.09                   | 0.66                   | 1.11                   |
| B (HXBc2)  | CD4, 17b        | 1G9M              | G     | 0.79                    | 1.16                   | 0.73                   | 1.13                   |
| B (HXBc2)  | CD4, 17b        | 1G9N              | G     | 0.76                    | 0.96                   | 0.78                   | 1.06                   |
| B (JR-FL)  | CD4, X5         | 2B4C              | G     | 0.68                    | 0.90                   | 0.66                   | 0.72                   |
| B (YU2)    | F23, 17b        | 1YYM              | G     | 0.83                    | 0.99                   | 0.86                   | 0.92                   |
| B (HXBc2)  | CD4, 17b        | 1RZJ              | G     | 0.76                    | 1.14                   | 0.71                   | 1.11                   |
| B (YU2)    | CD4, 17b        | 1RZK              | G     | 0.78                    | 0.97                   | 0.80                   | 1.05                   |
| B (YU2)    | CD4M33, 17b     | 1YYL              | G     | 0.88                    | 1.03                   | 0.91                   | 1.03                   |
| B (YU2)    | [Phe23]M47, 17b | 2I60              | G     | 0.81                    | 0.96                   | 0.87                   | 0.91                   |
| B (YU2)    | CD4M47, 17b     | 2I5Y              | G     | 0.87                    | 1.01                   | 0.93                   | 0.95                   |
| B (HXBc2)  | CD4, 17b        | 1GC1              | G     | 1.34                    | 1.55                   | 1.25                   | 1.99                   |
| C (CAP210) | CD4, 21c        | 3LQA <sup>2</sup> | G     | 1.96                    | 1.17                   | 2.42                   | 1.53                   |
| B (HXBc2)  | b12             | 2NY7              | G     | 4.14                    | 4.75                   | 1.92                   | 10.05                  |
| B (YU2)    | F105            | 3HII              | G     | 4.68                    | 2.75                   | 2.56                   | 20.24                  |
| B (HXBc2)  | b13             | 3IDX              | G     | 6.47                    | 6.10                   | 3.57                   | 33.54                  |
| SIV        | Unliganded      | 2BF1 <sup>2</sup> | A     | 8.44                    | 9.94                   | 6.79                   | 18.11                  |
| B (YU2)    | Unliganded      | 3TGQ              | A     | 0.80                    | 0.97                   | 0.72                   | 1.14                   |
| E(93TH057) | Unliganded      | 3TGT              | A     | 0.92                    | 0.61                   | 0.95                   | 1.07                   |
| C(ZM109)   | Unliganded      | 3TIH              | A     | 1.03                    | 0.77                   | 1.17                   | 1.03                   |
| E(93TH057) | VRC01           | 3NGB              | A     | 0.90                    | 0.63                   | 0.86                   | 1.17                   |

<sup>1</sup> C $\alpha$ -RMSDs of a set of common residues shared by all gp120s (RMSD<sub>com</sub>), of inner domain (RMSD<sub>ID</sub>), of outer domain (RMSD<sub>OD</sub>) and of bridging sheet (RMSD<sub>BS</sub>) were calculated after each of the gp120 structures was superimposed on the VRC01-bound gp120 structure. The common set consists of 253 residues, including residues 90-120, 204-205, 215-298, 329-355, 357-392, 395, 413-469 and 473-489. The inner domain (ID) contains three segments, residues 83-118, 206-252 and 476-492. The outer domain (OD) contains three segments, residues 253-397, 410-419 and 437-475. The bridging sheet contains two regions, residues 118-205 and 421-437.

<sup>2</sup> For 3LQA, which has adopted a different residue numbering, and 2BF1, which is the gp120 from SIV, sequence alignment with 1G9M is used to derive the standard HXBc2 numbering.



**Table S5. Structural comparison of unliganded clade E<sub>93TH057</sub> gp120 and gp120s in other crystalline lattices and bound by other ligands<sup>1</sup>**

| Clade      | Ligand(s)       | PDB               | Chain | RMSD <sub>com</sub> (Å) | RMSD <sub>ID</sub> (Å) | RMSD <sub>OD</sub> (Å) | RMSD <sub>BS</sub> (Å) |
|------------|-----------------|-------------------|-------|-------------------------|------------------------|------------------------|------------------------|
| B (HXBc2)  | CD4, 48d        | 3JWO              | A     | 0.91                    | 0.55                   | 1.19                   | 0.82                   |
| B (HXBc2)  | CD4, 48d        | 3JWD              | A     | 0.91                    | 0.55                   | 1.20                   | 0.83                   |
| B (HXBc2)  | CD4, 17b        | 2NXY              | A     | 1.03                    | 0.99                   | 1.10                   | 1.21                   |
| B (HXBc2)  | CD4, 17b        | 2NXZ              | A     | 1.06                    | 1.00                   | 1.11                   | 1.30                   |
| B (YU2)    | CD4, 412d       | 2QAD              | A     | 1.05                    | 1.18                   | 1.09                   | 0.95                   |
| B (HXBc2)  | CD4, 17b        | 1G9M              | G     | 1.11                    | 1.25                   | 1.11                   | 1.32                   |
| B (HXBc2)  | CD4, 17b        | 1G9N              | G     | 1.08                    | 1.11                   | 1.12                   | 1.45                   |
| B (JR-FL)  | CD4, X5         | 2B4C              | G     | 1.10                    | 1.10                   | 1.22                   | 1.04                   |
| B (YU2)    | F23, 17b        | 1YYM              | G     | 1.08                    | 1.06                   | 1.18                   | 1.20                   |
| B (HXBc2)  | CD4, 17b        | 1RZJ              | G     | 1.10                    | 1.24                   | 1.16                   | 1.31                   |
| B (YU2)    | CD4, 17b        | 1RZK              | G     | 1.09                    | 1.12                   | 1.14                   | 1.42                   |
| B (YU2)    | CD4M33, 17b     | 1YYL              | G     | 1.13                    | 1.13                   | 1.18                   | 1.25                   |
| B (YU2)    | [Phe23]M47, 17b | 2I60              | G     | 1.11                    | 1.09                   | 1.20                   | 1.30                   |
| B (YU2)    | CD4M47, 17b     | 2I5Y              | G     | 1.15                    | 1.16                   | 1.28                   | 1.34                   |
| B (HXBc2)  | CD4, 17b        | 1GC1              | G     | 1.53                    | 1.55                   | 1.61                   | 2.18                   |
| C (CAP210) | CD4, 21c        | 3LQA <sup>2</sup> | G     | 2.16                    | 1.27                   | 2.62                   | 1.65                   |
| B (HXBc2)  | b12             | 2NY7              | G     | 4.15                    | 4.68                   | 2.11                   | 9.95                   |
| B (YU2)    | F105            | 3HII              | G     | 4.59                    | 2.60                   | 2.67                   | 19.91                  |
| B (HXBc2)  | b13             | 3IDX              | G     | 6.58                    | 6.18                   | 3.90                   | 33.36                  |
| SIV        | Unliganded      | 2BF1 <sup>2</sup> | A     | 8.55                    | 10.11                  | 6.79                   | 18.26                  |
| B (YU2)    | Unliganded      | 3TGQ              | A     | 1.12                    | 1.10                   | 1.16                   | 1.60                   |
| C1086      | Unliganded      | 3TGR              | A     | 0.92                    | 0.61                   | 0.95                   | 1.07                   |
| C(ZM109)   | Unliganded      | 3TIH              | A     | 0.81                    | 0.67                   | 0.98                   | 0.89                   |
| E(93TH057) | VRC01           | 3NGB              | A     | 0.51                    | 0.32                   | 0.60                   | 0.88                   |

<sup>1</sup>  $\alpha$ -RMSDs of a set of common residues shared by all gp120s (RMSD<sub>com</sub>), of inner domain (RMSD<sub>ID</sub>), of outer domain (RMSD<sub>OD</sub>) and of bridging sheet (RMSD<sub>BS</sub>) were calculated after each of the gp120 structures was superimposed on the VRC01-bound gp120 structure. The common set consists of 253 residues, including residues 90-120, 204-205, 215-298, 329-355, 357-392, 395, 413-469 and 473-489. The inner domain (ID) contains three segments, residues 83-118, 206-252 and 476-492. The outer domain (OD) contains three segments, residues 253-397, 410-419 and 437-475. The bridging sheet contains two regions, residues 118-205 and 421-437.

<sup>2</sup> For 3LQA, which has adopted a different residue numbering, and 2BF1, which is the gp120 from SIV, sequence alignment with 1G9M is used to derive the standard HXBc2 numbering.

**Table S6. Structural comparison of unliganded clade C<sub>ZM109F.PB4</sub> gp120 and gp120s in other crystalline lattices and bound by other ligands<sup>1</sup>**

| Clade      | Ligand(s)       | PDB               | Chain | RMSD <sub>Com</sub> (Å) | RMSD <sub>ID</sub> (Å) | RMSD <sub>OD</sub> (Å) | RMSD <sub>BS</sub> (Å) |
|------------|-----------------|-------------------|-------|-------------------------|------------------------|------------------------|------------------------|
| B (HXBc2)  | CD4, 48d        | 3JWO              | A     | 0.99                    | 0.63                   | 1.40                   | 0.90                   |
| B (HXBc2)  | CD4, 48d        | 3JWD              | A     | 1.00                    | 0.63                   | 1.42                   | 0.89                   |
| B (HXBc2)  | CD4, 17b        | 2NXY              | A     | 1.12                    | 1.05                   | 1.34                   | 1.05                   |
| B (HXBc2)  | CD4, 17b        | 2NXZ              | A     | 1.15                    | 1.07                   | 1.35                   | 1.10                   |
| B (YU2)    | CD4, 412d       | 2QAD              | A     | 1.15                    | 1.29                   | 1.28                   | 0.97                   |
| B (HXBc2)  | CD4, 17b        | 1G9M              | G     | 1.18                    | 1.31                   | 1.34                   | 1.16                   |
| B (HXBc2)  | CD4, 17b        | 1G9N              | G     | 1.19                    | 1.14                   | 1.40                   | 1.32                   |
| B (JR-FL)  | CD4, X5         | 2B4C              | G     | 1.11                    | 1.08                   | 1.30                   | 1.02                   |
| B (YU2)    | F23, 17b        | 1YYM              | G     | 1.18                    | 1.06                   | 1.42                   | 1.17                   |
| B (HXBc2)  | CD4, 17b        | 1RZJ              | G     | 1.17                    | 1.30                   | 1.37                   | 1.16                   |
| B (YU2)    | CD4, 17b        | 1RZK              | G     | 1.20                    | 1.15                   | 1.42                   | 1.31                   |
| B (YU2)    | CD4M33, 17b     | 1YYL              | G     | 1.21                    | 1.13                   | 1.41                   | 1.24                   |
| B (YU2)    | [Phe23]M47, 17b | 2I60              | G     | 1.20                    | 1.09                   | 1.44                   | 1.22                   |
| B (YU2)    | CD4M47, 17b     | 2I5Y              | G     | 1.24                    | 1.17                   | 1.50                   | 1.33                   |
| B (HXBc2)  | CD4, 17b        | 1GC1              | G     | 1.57                    | 1.65                   | 1.68                   | 2.08                   |
| C (CAP210) | CD4, 21c        | 3LQA <sup>2</sup> | G     | 2.18                    | 1.42                   | 2.66                   | 1.47                   |
| B (HXBc2)  | b12             | 2NY7              | G     | 4.23                    | 4.89                   | 2.31                   | 9.96                   |
| B (YU2)    | F105            | 3HII              | G     | 4.63                    | 2.74                   | 2.88                   | 19.71                  |
| B (HXBc2)  | b13             | 3IDX              | G     | 6.58                    | 6.22                   | 3.98                   | 33.40                  |
| SIV        | Unliganded      | 2BF1 <sup>2</sup> | A     | 8.51                    | 10.09                  | 6.77                   | 17.90                  |
| C1086      | Unliganded      | 3TGR              | A     | 1.03                    | 0.77                   | 1.17                   | 1.03                   |
| E(93TH057) | Unliganded      | 3TGT              | A     | 0.81                    | 0.67                   | 0.98                   | 0.89                   |
| YU2        | Unliganded      | 3TGQ              | A     | 1.16                    | 1.05                   | 1.25                   | 1.46                   |
| E(93TH057) | VRC01           | 3NGB              | A     | 0.81                    | 0.67                   | 0.98                   | 1.07                   |

<sup>1</sup> C $\alpha$ -RMSDs of a set of common residues shared by all gp120s (RMSD<sub>Com</sub>), of inner domain (RMSD<sub>ID</sub>), of outer domain (RMSD<sub>OD</sub>) and of bridging sheet (RMSD<sub>BS</sub>) were calculated after each of the gp120 structures was superimposed on the VRC01-bound gp120 structure. The common set consists of 253 residues, including residues 90-120, 204-205, 215-298, 329-355, 357-392, 395, 413-469 and 473-489. The inner domain (ID) contains three segments, residues 83-118, 206-252 and 476-492. The outer domain (OD) contains three segments, residues 253-397, 410-419 and 437-475. The bridging sheet contains two regions, residues 118-205 and 421-437.

<sup>2</sup> For 3LQA, which has adopted a different residue numbering, and 2BF1, which is the gp120 from SIV, sequence alignment with 1G9M is used to derive the standard HXBc2 numbering.

**Table S7. Isothermal titration calorimetry**Clade B<sub>YU2</sub> gp120 core<sub>e</sub> (44-492 ΔV12/V3s)

| gp120             | Ligand   | $\Delta G_{(25^\circ\text{C})}$ | $\Delta G_{(37^\circ\text{C})}$ | $\Delta H_{(25^\circ\text{C})}$ | $\Delta H_{(37^\circ\text{C})}$ | $-T\Delta S_{(25^\circ\text{C})}$ | $-T\Delta S_{(37^\circ\text{C})}$ |
|-------------------|----------|---------------------------------|---------------------------------|---------------------------------|---------------------------------|-----------------------------------|-----------------------------------|
| core <sub>e</sub> | CD4      | -11.1                           | -12.2                           | -19.5                           | -26.5                           | 8.4                               | 14.3                              |
| core <sub>e</sub> | VRC01Fab | -12.3                           | -11.2                           | -26.5                           | -36.9                           | 14.2                              | 25.7                              |
| core <sub>e</sub> | 17b Fab  | -12.6                           | -12.8                           | -16.5                           | -45.3                           | 3.9                               | 24.2                              |

Clade B<sub>YU2</sub> Full-length (FL) gp120

| gp120  | Ligand   | $\Delta G_{(25^\circ\text{C})}$ | $\Delta G_{(37^\circ\text{C})}$ | $\Delta H_{(25^\circ\text{C})}$ | $\Delta H_{(37^\circ\text{C})}$ | $-T\Delta S_{(25^\circ\text{C})}$ | $-T\Delta S_{(37^\circ\text{C})}$ |
|--------|----------|---------------------------------|---------------------------------|---------------------------------|---------------------------------|-----------------------------------|-----------------------------------|
| YU2 FL | CD4      | -10.5                           | -10.7                           | -27.0                           | -55.6                           | 16.5                              | 45.0                              |
| YU2 FL | VRC01Fab | -11.0                           | -11.2                           | -26.7                           | -46.9                           | 15.7                              | 35.7                              |
| YU2 FL | 17b Fab  | -10.9                           | -11.0                           | -24.0                           | -51.6                           | 13.1                              | 40.6                              |

Clade B<sub>YU2</sub> Full-length gp120 (S375W)

| gp120         | Ligand   | $\Delta G_{(25^\circ\text{C})}$ | $\Delta G_{(37^\circ\text{C})}$ | $\Delta H_{(25^\circ\text{C})}$ | $\Delta H_{(37^\circ\text{C})}$ | $-T\Delta S_{(25^\circ\text{C})}$ | $-T\Delta S_{(37^\circ\text{C})}$ |
|---------------|----------|---------------------------------|---------------------------------|---------------------------------|---------------------------------|-----------------------------------|-----------------------------------|
| YU2 FL(S375W) | CD4      | -                               | -11.1                           | -                               | -33.9                           | -                                 | 22.8                              |
| YU2 FL(S375W) | VRC01Fab | -                               | -11.2                           | -                               | -33.9                           | -                                 | 22.7                              |
| YU2 FL(S375W) | 17b Fab  | -                               | -10.9                           | -                               | -37.3                           | -                                 | 26.4                              |

Clade C<sub>1086</sub> gp120 core<sub>e</sub> (44-492 ΔV12/V3s)

| gp120             | Ligand   | $\Delta G_{(25^\circ\text{C})}$ | $\Delta G_{(37^\circ\text{C})}$ | $\Delta H_{(25^\circ\text{C})}$ | $\Delta H_{(37^\circ\text{C})}$ | $-T\Delta S_{(25^\circ\text{C})}$ | $-T\Delta S_{(37^\circ\text{C})}$ |
|-------------------|----------|---------------------------------|---------------------------------|---------------------------------|---------------------------------|-----------------------------------|-----------------------------------|
| core <sub>e</sub> | CD4      | -11.4                           | -11.7                           | -19.4                           | -32.9                           | 8.1                               | 21.9                              |
| core <sub>e</sub> | VRC01Fab | -10.5                           | -10.3                           | -19.6                           | -39.8                           | 8.3                               | 29.6                              |
| core <sub>e</sub> | 17b Fab  | -10.5                           | -11.9                           | -12.0                           | -31.6                           | 1.05                              | 19.8                              |

Clade C<sub>1086</sub> Full-length (FL) gp120

| gp120   | Ligand   | $\Delta G_{(25^\circ\text{C})}$ | $\Delta G_{(37^\circ\text{C})}$ | $\Delta H_{(25^\circ\text{C})}$ | $\Delta H_{(37^\circ\text{C})}$ | $-T\Delta S_{(25^\circ\text{C})}$ | $-T\Delta S_{(37^\circ\text{C})}$ |
|---------|----------|---------------------------------|---------------------------------|---------------------------------|---------------------------------|-----------------------------------|-----------------------------------|
| 1086 FL | CD4      | -9.0                            | -11.3                           | -21.5                           | -51.6                           | 12.5                              | 40.3                              |
| 1086 FL | VRC01Fab | -9.4                            | -9.8                            | -18.2                           | -47.0                           | 8.8                               | 37.2                              |
| 1086 FL | 17b Fab  | -11.0                           | -11.1                           | -18.3                           | -52.3                           | 7.3                               | 41.2                              |

**Table S8. Kinetic parameters on gp120 variants interactions with NBD-556 or sCD4**

Ligand: NBD-556 (~6.5 RU)

| Analyte                  | $K_D$ ( $\mu$ M) | % bound     | $R_{max}$ |
|--------------------------|------------------|-------------|-----------|
| YU2 core <sub>min</sub>  | 370.2            | 6.0 (7.5)   | 185.2     |
| YU2 core <sub>e</sub>    | 4.1              | 79.1 (100)  | 185.2     |
| YU2 44-492 $\Delta$ V1/2 | 4.7              | 77.5 (97.9) | 185.2     |
| YU2 44-492 $\Delta$ V3   | 21.8             | 46.9 (59.2) | 185.2     |
| YU2 Full-length          | 76.1             | 22.3 (28.1) | 185.2     |

$K_D$ 's were calculated by fitting responses from all analytes globally and sharing the same  $R_{max}$  (185.2 RU) for gp120 variants : NBD-556 binding. Numbers in parenthesis represent % bound analytes to ligand, NBD-556, normalized to % bound YU2 core<sub>e</sub> to NBD-556.

Ligand: sCD4 (~200 RU)

| Analyte                  | $k_a$ (1/Ms) ( <sup>1</sup> ) | $k_d$ (1/s)           | $K_D$ (nM) | $R_{max}$ (RU) |
|--------------------------|-------------------------------|-----------------------|------------|----------------|
| YU2 core <sub>min</sub>  | $2.67 \times 10^4$ (1.64)     | $1.26 \times 10^{-3}$ | 47.0       | 26.0           |
| YU2 core <sub>e</sub>    | $4.66 \times 10^4$ (2.88)     | $1.87 \times 10^{-4}$ | 4.0        | 42.1           |
| YU2 44-492 $\Delta$ V1/2 | $3.16 \times 10^4$ (1.95)     | $1.74 \times 10^{-4}$ | 5.5        | 39.9           |
| YU2 44-492 $\Delta$ V3   | $4.95 \times 10^4$ (3.05)     | $6.07 \times 10^{-4}$ | 12.3       | 41.4           |
| YU2 Full-length          | $1.62 \times 10^4$ (1.00)     | $8.90 \times 10^{-4}$ | 55.0       | 35.5           |

<sup>1</sup> Fold increase over full-length

**Table S9. Neutralization profiles of sCD4, NBD-556, and other ligands against clade B and C reference viruses**

|                          |                  | IC <sub>50</sub> values (μM) |            |              |              | IC <sub>80</sub> values (μM) |                |              |                |
|--------------------------|------------------|------------------------------|------------|--------------|--------------|------------------------------|----------------|--------------|----------------|
|                          |                  | sCD4                         | NBD-556    | 17b IgG      | 48d IgG      | sCD4                         | NBD-556        | 17b IgG      | 48d IgG        |
| Tier 1 clade B<br>(n=7)  | HXB2             | 0.0005                       | 4.7        | 0.007        | 0.002        | 0.001                        | 19             | 0.043        | 0.224          |
|                          | MN.3             | 0.0005                       | 67         | 0.002        | 0.001        | 0.001                        | >100           | 0.009        | 0.002          |
|                          | BaL.01           | 0.001                        | 42         | >0.5         | >0.5         | 0.003                        | 78             | >0.5         | >0.5           |
|                          | BaL.26           | 0.002                        | 39         | 0.132        | >0.5         | 0.005                        | 88             | >0.5         | >0.5           |
|                          | ADA              | 0.004                        | 17         | 0.037        | 0.064        | 0.013                        | 68             | >0.5         | >0.5           |
|                          | SF162            | 0.005                        | 18         | 0.017        | 0.093        | 0.013                        | 37             | 0.313        | >0.5           |
|                          | SS1196.1         | 0.013                        | 13         | 0.026        | 0.126        | 0.052                        | 34             | 0.340        | >0.5           |
| Tier 2 clade B<br>(n=18) | YU2              | 0.004                        | 75         | >0.5         | >0.5         | 0.010                        | >100           | >0.5         | >0.5           |
|                          | 89.6             | 0.006                        | 11         | >0.5         | >0.5         | 0.015                        | 26             | >0.5         | >0.5           |
|                          | THRO.18          | 0.010                        | 43         | >0.5         | >0.5         | 0.035                        | >100           | >0.5         | >0.5           |
|                          | REJO.67          | 0.017                        | 12         | >0.5         | >0.5         | 0.107                        | 70             | >0.5         | >0.5           |
|                          | JR-FL            | 0.017                        | >100       | >0.5         | >0.5         | 0.038                        | >100           | >0.5         | >0.5           |
|                          | QH0692.42        | 0.034                        | 37         | >0.5         | >0.5         | 0.098                        | 99             | >0.5         | >0.5           |
|                          | 6535.3           | 0.050                        | 12         | >0.5         | >0.5         | 0.383                        | 33             | >0.5         | >0.5           |
|                          | RHPA.7           | 0.050                        | >100       | >0.5         | >0.5         | 0.249                        | >100           | >0.5         | >0.5           |
|                          | 7165.18          | 0.077                        | 11         | >0.5         | >0.5         | 0.342                        | 34             | >0.5         | >0.5           |
|                          | 6101.10          | 0.109                        | 11         | >0.5         | >0.5         | 0.183                        | 19             | >0.5         | >0.5           |
|                          | PVO.4            | 0.151                        | 80         | >0.5         | >0.5         | 0.457                        | >100           | >0.5         | >0.5           |
|                          | WITO.33          | 0.185                        | 43         | >0.5         | >0.5         | 0.506                        | >100           | >0.5         | >0.5           |
|                          | SC422.8          | 0.205                        | >100       | >0.5         | >0.5         | >1.5                         | >100           | >0.5         | >0.5           |
|                          | TRJO.58          | 0.362                        | 87         | >0.5         | >0.5         | 0.632                        | >100           | >0.5         | >0.5           |
|                          | CAAN.A2          | 0.550                        | 8.3        | >0.5         | >0.5         | >1.5                         | 18             | >0.5         | >0.5           |
|                          | AC10.29          | 0.554                        | 100        | >0.5         | >0.5         | 1.440                        | >100           | >0.5         | >0.5           |
| TRO.11                   | 0.599            | >100                         | >0.5       | >0.5         | >1.5         | >100                         | >0.5           | >0.5         |                |
| BG1168.1                 | 0.716            | 14                           | >0.5       | >0.5         | >1.5         | 30                           | >0.5           | >0.5         |                |
|                          | breadth n=25     | <b>100%</b>                  | <b>84%</b> | <b>24%</b>   | <b>20%</b>   | <b>84%</b>                   | <b>56%</b>     | <b>16%</b>   | <b>8%</b>      |
|                          | geometric mean   | <b>0.028</b>                 | <b>25</b>  | <b>0.018</b> | <b>0.012</b> | <b>0.049</b>                 | <b>40</b>      | <b>0.080</b> | <b>0.021</b>   |
| Tier 1 clade C           | MW965.26         | 0.005                        | 53         | 0.001        | 0.305        | 0.069                        | >100           | 0.002        | >0.5           |
| Tier 2 clade C<br>(n=16) | ZM109.4          | 0.005                        | 98         | >0.5         | >0.5         | 0.020                        | >100           | >0.5         | >0.5           |
|                          | Du123.6          | 0.006                        | >100       | >0.5         | >0.5         | 0.016                        | >100           | >0.5         | >0.5           |
|                          | Du172.17         | 0.041                        | 65         | >0.5         | >0.5         | 0.116                        | >100           | >0.5         | >0.5           |
|                          | Du151.2          | 0.058                        | >100       | >0.5         | >0.5         | 0.142                        | >100           | >0.5         | >0.5           |
|                          | CAP210.E8        | 0.078                        | >100       | >0.5         | >0.5         | 0.342                        | >100           | >0.5         | >0.5           |
|                          | ZM233.6          | 0.118                        | 42         | >0.5         | >0.5         | 0.322                        | >100           | >0.5         | >0.5           |
|                          | CAP244.D3        | 0.134                        | 92         | >0.5         | >0.5         | 0.395                        | >100           | >0.5         | >0.5           |
|                          | ZM197.7          | 0.153                        | 74         | >0.5         | >0.5         | 0.723                        | >100           | >0.5         | >0.5           |
|                          | ZM53.12          | 0.163                        | >100       | >0.5         | >0.5         | 0.455                        | >100           | >0.5         | >0.5           |
|                          | ZM214.15         | 0.169                        | >100       | >0.5         | >0.5         | >1.5                         | >100           | >0.5         | >0.5           |
|                          | ZM135.10a        | 0.186                        | >100       | >0.5         | >0.5         | 0.814                        | >100           | >0.5         | >0.5           |
|                          | ZM249.1          | 0.190                        | 95         | >0.5         | >0.5         | 0.693                        | >100           | >0.5         | >0.5           |
|                          | Du422.1          | 0.221                        | >100       | >0.5         | >0.5         | 0.646                        | >100           | >0.5         | >0.5           |
|                          | Du156.12         | 0.450                        | 76         | >0.5         | >0.5         | 1.42                         | >100           | >0.5         | >0.5           |
|                          | ZM106.9          | 1.114                        | >100       | >0.5         | >0.5         | >1.5                         | >100           | >0.5         | >0.5           |
|                          | CAP45.G3         | 1.5                          | >100       | >0.5         | >0.5         | >1.5                         | >100           | >0.5         | >0.5           |
|                          | Breadth n=17     | <b>100%</b>                  | <b>47%</b> | <b>6%</b>    | <b>6%</b>    | <b>82%</b>                   | <b>0%</b>      | <b>6%</b>    | <b>0%</b>      |
|                          | Geometric mean   | <b>0.101</b>                 | <b>72</b>  | <b>0.001</b> | <b>0.305</b> | <b>0.244</b>                 | <b>&gt;100</b> | <b>0.002</b> | <b>&gt;0.5</b> |
| SIV                      | SIVmac251.30.SIV | 0.060                        | 88         | >0.5         | >0.5         | 0.847                        | >100           | >0.5         | >0.5           |
| control                  | MuLV.SG3         | >1.5                         | >100       | >0.5         | >0.5         | >1.5                         | >100           | >0.5         | >0.5           |
